1 MISTR: A conserved Mitochondrial STress Response network revealed by signatures of evolutionary  
2 conflict

3

4

5

6

7

8

9

10

11

12

13

14 Mahsa Sorouri<sup>1,2</sup>, Tyron Chang<sup>1,3#</sup>, Palmy Jesudhasan<sup>1#</sup>, Chelsea Pinkham<sup>1</sup>, Nels C. Elde<sup>4\*</sup>, and Dustin  
15 C. Hancks<sup>1\*</sup>

16 <sup>1</sup>Department of Immunology, University of Texas Southwestern Medical Center, Dallas, TX, <sup>2</sup>Institute of  
17 Biomedical Studies, Baylor University, Waco, TX, <sup>3</sup>Genetics, Development, and Disease Ph.D. program  
18 UT Southwestern Medical Center, <sup>4</sup>Eccles Institute of Human Genetics, The University of Utah Medical  
19 School, UT, USA

20 #These authors contributed equally.

21 \*To whom correspondence should be addressed: [dustin.hancks@utsouthwestern.edu](mailto:dustin.hancks@utsouthwestern.edu),  
22 [nelde@genetics.utah.edu](mailto:nelde@genetics.utah.edu)

23

24 Keywords: MISTR, NDUFA4, NDUFA4L2, C15ORF48, *mir-210*, *mir-147b*, AA467197, mitochondria,  
25 antiviral, stress, hypoxia, OXPHOS, interferon, evolution

26

27 **ABSTRACT**

28 Host-pathogen conflicts leave genetic signatures of variation in homologous host genes. Using these  
29 “molecular scars” as a guide, we discovered a vertebrate-specific Mitochondrial Stress Response circuit  
30 (MISTR). MISTR proteins are associated with electron transport chain factors and activated by stress  
31 signals such as interferon-gamma and hypoxia. Upon stress, ultraconserved miRNAs downregulate  
32 MISTR1 followed by replacement with paralogs MISTR AntiViral (MISTR<sub>AV</sub>) or MISTR Hypoxia  
33 (MISTR<sub>H</sub>), depending on the insult. While cells lacking MISTR1 are more sensitive to apoptotic triggers,  
34 cells lacking MISTR<sub>AV</sub> or expressing the poxvirus-encoded vMISTR<sub>AV</sub> exhibit resistance to the same  
35 insults. Rapid evolution signatures across primate genomes for *MISTR1* and *MISTR<sub>AV</sub>* indicate ancient  
36 and ongoing conflicts with pathogens. MISTR proteins are also found in plants, yeasts, and an algal virus  
37 indicating ancient origins and suggesting diverse means of altering mitochondrial function under stress.  
38 The discovery of MISTR circuitry highlights the use of evolution-guided studies to reveal fundamental  
39 biological processes.

40

41

42

43

44

45

46

47

48

## 49 INTRODUCTION

50 Innate immunity is a critical frontline host defense mechanism in response to pathogen infection.  
51 At the onset of infections in vertebrates, a set of more than 400 genes are transcriptionally upregulated  
52 by interferon and thus termed interferon-stimulated genes (ISGs). ISGs display diverse functions such  
53 as activation of cell death programs and recruitment of immune cells (e.g. dendritic cells (Schneider et  
54 al., 2014; Schoggins, 2014). Although the identities of many of these genes are established, the functions  
55 of the majority of these gene products as well as their relationship with other cellular factors is unknown  
56 (Schoggins et al., 2011; 2014). To dissect the function of poorly characterized ISGs, we used a  
57 comparative approach to identify signatures of positive selection consistent with important functional roles  
58 in immune responses (Daugherty and Malik, 2012). Specifically, we sought to identify ISGs lacking known  
59 functions with hallmarks of repeated conflicts with pathogens, like those detected for interferon-inducible  
60 double-stranded RNA sensor oligoadenylate synthetase 1 (OAS1), which in addition to signatures of  
61 rapid evolution (Hancks et al., 2015; Mozzi et al., 2015) are also encoded in virus genomes (Darby et al.,  
62 2014).

63 Viruses can encode proteins that mimic host proteins to manipulate cellular functions and  
64 inactivate immune defenses. This form of mimicry is commonly achieved by the acquisition of a host-  
65 coding sequence through horizontal gene transfer (HGT) followed by subfunctionalization via cycles of  
66 mutation and selection (Elde and Malik, 2009). Importantly, many viral mimics can be identified based on  
67 residual sequence identity (Spector et al., 1978). Along with inhibitors of immune function, mimics for  
68 master regulators of cellular functions such as *vSRC*, *vMYC*, and *vRAS* have been identified in virus  
69 genomes [reviewed in (Bishop, 1985)]. Our studies here stem from the identification of a viral ortholog  
70 for the ORFan ISG, *C15ORF48* [also known as *normal mucosal esophageal-specific gene product 1*  
71 (*NMES1*) (Zhou et al., 2002), mouse *AA467197*] - hereafter Mitochondrial STress Response AntiViral  
72 (*MISTRAV*) - which is encoded by the large double-stranded DNA (dsDNA) virus squirrelpox, viral  
73 *MISTRAV* (*SQPV078/vMISTRAV*).

74 Pathogen proteins mimicking host functions often directly bind host factors during infection to  
75 modulate cellular functions (Elde et al., 2008). Over evolutionary time, this action can impose strong

76 selective pressure on the infected host, resulting in the increased frequency of host genetic variants in  
77 the population less susceptible to binding by a pathogen-encoded inhibitor (Daugherty and Malik, 2012).  
78 Recurrent rapid evolution resulting from genetic conflicts can be observed at the sequence level when  
79 the rate of nonsynonymous amino acid substitutions relative to the rate of synonymous substitutions  
80 (dN/dS) is greater than one when comparing orthologous proteins from closely related species.

81 Here, we focus on the rapidly evolving, interferon-gamma inducible MISTRV which is encoded  
82 by a poxvirus. Our dissection of MISTRV function unexpectedly revealed a stress-response circuit  
83 involving its paralogs *MISTR1* [also known as *NADH dehydrogenase ubiquinone 1 alpha subcomplex*  
84 *subunit 4 (NDUFA4)*] and *MISTR Hypoxia (MISTRH)* [also known as *NADH dehydrogenase ubiquinone*  
85 *1 alpha subcomplex subunit 4 like-2 (NDUFA4L2)*], which are linked through regulation by the  
86 ultraconserved miRNAs *miR-147b* and *miR-210*. Localization analysis indicates MISTRV and the virus-  
87 encoded vMISTRV are mitochondrial proteins in agreement with paralogs *MISTR1* (Balsa et al., 2012)  
88 and *MISTRH* (Tello et al., 2011) being putative supernumerary electron transport chain (ETC) factors.

89 Functional analysis in cell lines shows that loss of MISTRV is associated with a reduction in  
90 apoptosis – a fundamental host defense to block pathogen replication. Correspondingly, a mutation  
91 resulting in a > 30- fold increase in levels of the *MISTRV*-embedded *miR-147b* triggers a more robust  
92 activation of apoptosis in response to the cell death agonist staurosporine. Genetic and functional  
93 analysis reveal that the rapidly evolving paralog of *MISTRV* - *MISTR1* - is a major target of the  
94 ultraconserved *miR-147b* as well as the hypoxia-inducible *miR-210* (Huang et al., 2009) which targets  
95 the same microRNA response element as *miR-147b*. Furthermore, we show that vMISTRV can  
96 counteract triggers of apoptosis, consistent with the ability of viruses to counteract host defenses  
97 mediated by MISTR.

98 We propose a model for the vertebrate-specific Mitochondrial STress Response circuit (MISTR).  
99 *MISTR* genes exhibit a wide distribution of variation including homologs in plants, animals, and parasites,  
100 repeated duplications of paralogs between species, and a MISTR homolog in a giant DNA virus that  
101 infects algae. In addition to augmenting host immune defenses, MISTR may be a modular system with  
102 the capacity to respond to diverse stressors through regulation by specific miRNAs that downregulate

103 MISTR1, while concurrent induction of MISTR paralogs replace MISTR1 to shape the mitochondrial  
104 response to perturbations.

## 105 **RESULTS**

### 106 ***MISTR* proteins are encoded by highly diverged large DNA viruses**

107 Human *MISTR*AV (*C15ORF48*, *NMES1*) is an eighty-three amino acid (AA) protein with a short  
108 N-terminus and a longer C-terminus demarcated by an intervening predicted single-pass transmembrane  
109 (TMEM) domain (Figure 1A). Domain analysis indicates that *MISTR*AV belongs to the poorly  
110 characterized B12D, NADH: ubiquinone reductase complex I MLRQ subunit family (pfam:06522). Using  
111 blastp analysis, we identified a 91 AA predicted ORF (SQPV78/YP\_008658503.1) with high identity to  
112 human *MISTR*AV [47% (38/81) amino acid identity, 66% positives (54/81)](Figure 1B) in the squirrelpox  
113 genome, hereafter *vMISTR*AV.

114 Reciprocal blastp analysis indicates *vMISTR*AV was presumably acquired by horizontal gene  
115 transfer derived from a host copy of *MISTR*AV. Specifically, using *vMISTR*AV AA sequence as a query  
116 returns numerous host *MISTR*AV sequences – and not sequences of *MISTR*AV paralogs - from diverse  
117 species (Additional details in Supplementary file 6). Consistently, domain analysis indicates *vMISTR*AV  
118 has a similar primary structure to host *MISTR*AV: short N-terminus, single-pass TMEM domain, longer  
119 C-terminus, and a B12D domain spanning these features (Figure 1B).

120 Subsequent database searches detected another *MISTR* ORF (*TetV-113/AUF82205.1*),  
121 hereafter *vMISTR* *Algae* (*vMISTR*A), in the genome of the giant DNA virus (Schvarcz and Steward, 2018)  
122 Tetraselmis virus 1 (TetV-1) - a mimivirus - that infects the cosmopolitan green alga *Tetraselmis* (Figure  
123 1C). *vMISTR*A encodes a predicted 83 AA ORF with a primary structure similar to *MISTR*AV and  
124 *vMISTR*AV: short N-terminus, predicted single-pass TMEM domain, longer C-terminal domain, and a  
125 B12D domain spanning these features. A clustal amino acid alignment using three *Tetraselmis* *MISTR*  
126 protein sequences from the database indicates that *vMISTR*A displays the greatest homology with  
127 A0A061RM32 in UniProt (40% identity by blastp) (Figure 1- figure supplement 1A-B). Thus, sequences  
128 resembling *MISTR* proteins are encoded by viruses that infect hosts from algae to mammals.

129 ***MISTR*AV is upregulated by interferon and localizes to the mitochondria**

130 A hallmark shared by many immune defense factors critical to modulating infections is  
131 upregulation by immune signals such as interferon. To test whether *MISTR*AV is an ISG, we performed  
132 RT-PCR on samples from various human and mouse cell lines treated with either Type I (IFN- $\alpha$ ) or Type  
133 II Interferon (IFN- $\gamma$ ). While *MISTR*AV is induced by IFN- $\alpha$  in A549 lung epithelial cells, our data indicate  
134 that *MISTR*AV is primarily upregulated by IFN- $\gamma$  in the human and mouse cell lines tested (Figure 1D).  
135 Thus, *MISTR*AV displays two key hallmarks of crucial immune factors like OAS1: upregulation by immune  
136 signals and viral homologs (*vMISTR*AV, *vMISTR*A).

137 Both human and mouse (known as AA467197) *MISTR*AV have evidence for mitochondrial  
138 localization. The inventory of mammalian mitochondrial genes – MitoCarta (Calvo et al., 2016; Pagliarini  
139 et al., 2008) - detected *MISTR*AV in mitochondria across various tissues: small intestine, large intestine,  
140 stomach, placenta, and testis. In addition, *MISTR*AV is related to two known mitochondrial factors  
141 (*MISTR*1 and *MISTR*H) thought to be supernumerary factors associated with the electron transport chain  
142 (Balsa et al., 2012; Floyd et al., 2016; Tello et al., 2011). Consistent with previous findings, our expression  
143 of *MISTR*AV-GFP and *vMISTR*AV-GFP in HeLa cells revealed strong co-localization with the  
144 mitochondrial marker, MitoTracker (Figure 1E). Intriguingly, *vMISTR*AV-GFP expression in some cells  
145 resulted in altered morphology of the cell and/or mitochondria (Figure 1E).

#### 146 ***MISTR*AV belongs to a gene family rapidly evolving in primates**

147 *MISTR*AV and its poorly characterized paralogs *MISTR*1 and *MISTR*H – are conserved over 450  
148 million years of evolution as evidenced by the presence of orthologs in the zebrafish and spotted gar  
149 genomes (Figure 2- figure supplement 1). To gain insights into the recent evolution of all three *MISTR*  
150 proteins, we carried out evolutionary analysis using sequences for primate orthologs spanning more than  
151 35 million years of divergence (Figure 2, Supplementary file 1, Supplementary file 6). Specifically, we  
152 tested if *MISTR* proteins display elevated rates of nonsynonymous amino acid substitution relative to  
153 synonymous substitution rates ( $dN/dS > 1$ ) to determine if these proteins are likely to be engaged in  
154 genetic conflicts with pathogen-encoded inhibitors (McLaughlin and Malik, 2017) (Daugherty and Malik,  
155 2012).

156 Comparative analyses of twenty-three primate orthologs using codon-based models implemented  
157 in PAML (Yang, 2007) (Figure 2, Supplementary file 6) revealed that both *MISTR*AV [M7 vs. M8 (F3X4)  
158  $p < 0.0012$ ] and *MISTR*1 [M7 vs. M8 (F3X4)  $p < 0.0046$ ] but not *MISTR*H [M7 vs. M8 (F3X4)  $p < 1.0000$ ]  
159 display gene-wide rapid evolution patterns. Furthermore, these signatures in *MISTR*AV and *MISTR*1  
160 appear independent of any potential relaxed constraint within the predicted transmembrane (TMEM)  
161 domain as the signal is maintained when that domain is removed in additional tests [*MISTR*AV - M7 vs.  
162 M8 (F3X4)  $p < 0.0040$ , *MISTR*1 - M7 vs. M8 (F3X4)  $p < 0.0040$ ]. Calculating dN/dS values across the  
163 primate phylogeny using PAML identified multiple, distinct lineages in all three primate families  
164 [Hominoids (HOM), Old World Monkeys (OWM), and New World Monkeys (NWM)] with robust and  
165 recurrent signatures of rapid evolution for both *MISTR*AV and *MISTR*1.

166 Signatures of positive selection at specific amino acid residues can reveal key protein surfaces  
167 targeted by pathogen-encoded inhibitors and the number of surfaces with elevated dN/dS values is  
168 hypothesized to correlate with the number of interfaces (Daugherty and Malik, 2012). Using PAML (Yang,  
169 2007), MEME (Murrell et al., 2012), FUBAR (Murrell et al., 2013)], we estimated dN/dS per amino acid  
170 site for *MISTR* genes. These analyses (Figure 2D, Figure 2E, Figure 2F) revealed seven different amino  
171 acid positions (~8% of the whole-protein) distributed through *MISTR*AV with evidence of positive selection  
172 including two sites (21T and 79Q) identified by all three analyses. For *MISTR*1, three amino acid positions  
173 were predicted for rapid evolution owing to elevated dN/dS values, with 6I being notable for its detection  
174 by all three analyses.

175 Protein modeling with SWISS-MODEL (<https://swissmodel.expasy.org/>)(Waterhouse et al.,  
176 2018)(Figure 2G, Figure 2H, Figure 2I) using the only predicted structure of Complex IV to include  
177 *MISTR*1 [PDB:5Z62] (Zong et al., 2018) illustrates that *MISTR* TMEM domains are accessible for  
178 interfacing with cellular proteins. Thus, rapid evolution in the TMEM is unlikely to reflect relaxed  
179 constraint. Collectively, the rapid evolution signature observed for *MISTR*AV and *MISTR*1 resemble that  
180 of other host factors that can dictate the outcomes of infections.

181 **Functional analyses support a role for *MISTR*AV and its encoded *miR-147b* in apoptosis**

182 To investigate *MISTRAV* biology, we generated three A549 clonal cell lines – C15 $\Delta$ 1, C15 $\Delta$ 2, C15 $\Delta$ 3 -  
183 with distinct indels that disrupted the *MISTRAV* ORF using CRISPR/CAS (Figure 3A). A549 cells were  
184 selected because: 1) *MISTRAV* is interferon-inducible in these cells (Figure 1D, Figure 3B), 2) A549 cells  
185 are often used as a model for immune activation (Li et al., 2017), and relatedly, 3) this cell line is frequently  
186 used to model viral infections (Li et al., 2016) (e.g. coronaviruses, influenza, poxviruses). Consistent with  
187 the engineered mutations (Figure 3A), western blot analysis confirmed loss of *MISTRAV* protein in all  
188 three clones (Figure 3B). To maintain expression of a poorly characterized miRNA encoded by the 3'-  
189 UTR of *MISTRAV* (*miR-147b*) (Liu et al., 2009), we targeted the guide RNAs to exon 2 relative to the  
190 long *MISTRAV* isoform (Figure 3A, 875 nt) - a location where a frameshift in the RNA would be predicted  
191 to escape nonsense-mediated decay.

192 RT-PCR indicated that C15 $\Delta$ 1 and C15 $\Delta$ 2 cells lack full-length (FL) *MISTRAV* RNA expression in  
193 IFN- $\gamma$  treated cells at steady-state while C15 $\Delta$ 3 cells display a fortuitous and drastic increase of the same  
194 transcript (Figure 3C). miRNA qPCR demonstrated that C15 $\Delta$ 1 and C15 $\Delta$ 2, maintain *miR-147b* at levels  
195 comparable to wild-type with expression of *miR-147b* in C15 $\Delta$ 3 ~30 fold greater than WT (Figure 3D).  
196 Thus, C15 $\Delta$ 1 and C15 $\Delta$ 2 lack *MISTRAV* protein but maintain the miRNA, while C15 $\Delta$ 3 lacks *MISTRAV*  
197 with a gain-of-function of *miR-147b* expression.

198 Based on *MISTRAV* mitochondrial localization and numerous documented connections between  
199 immune responses involving cell death mediated through mitochondria, we reasoned that *MISTR* might  
200 mediate apoptotic responses. We primed WT and KO cells with IFN- $\gamma$  then added the commonly used  
201 activator of apoptosis, staurosporine (STS), for 16 hours followed by functional analysis (Figure 3E).  
202 Assays were normalized to either untreated controls or to the number of cells being tested to account for  
203 differences in proliferation rates (Figure 3- figure supplement 1). Interestingly, we observed that C15 $\Delta$ 1  
204 and C15 $\Delta$ 2 displayed reduced sensitivity to STS, while C15 $\Delta$ 3 showed increased sensitivity to STS  
205 compared to WT cells (Figure 3F). Consistent with these results, we detected robust caspase-3/7  
206 cleavage activity for C15 $\Delta$ 3 compared to WT (Figure 3G; p<0.0001). In addition, detectable decreases in  
207 caspase-3/7 activity were observed for C15 $\Delta$ 1 and C15 $\Delta$ 2 relative to WT treated cells (Figure 3G;  
208 p<0.0001). The differential sensitivities of the clones to STS relative to WT were consistent with levels of



209 PARP cleavage across the clones in response to STS (Figure 3H). These data suggest a role for  
210 MISTRV and *miR-147b* in apoptosis.

### 211 **Ultraconserved miRNAs link MISTR paralogs**

212 To gain insights into the increased levels of apoptosis in C15Δ3 cells associated with *miR-147b*  
213 [*miR-147* in mouse (Liu et al., 2009)] we performed comparative miRNA target analysis. A recent survey  
214 indicates that the *miR-147b* seed sequence is conserved in vertebrate orthologs (Bartel, 2018).  
215 Strikingly, our sequence analysis demonstrated that all twenty-two nucleotides of *miR-147b* miRNA are  
216 identical between human and spotted gar; which represents around 450 million years of divergence from  
217 a common ancestor (Figure 4). Interestingly, although the *MISTRV* locus is present in the zebrafish  
218 genome, *miR-147b* sequence is likely non-functional because of disruptive indels (Figure 4, Figure 4-  
219 figure supplement 1).

220 miRNA target analysis uncovered 36 [(mirdb.org)(Wong and Wang, 2015)(Liu and Wang, 2019)]  
221 and 19 [TargetsCan (www.targetscan.org) (Agarwal et al., 2015)] *miR-147b* predicted targets  
222 (Supplementary files 2 and 3), of which only two were shared by both databases: *C11orf87* and the  
223 *MISTRV* paralog, *MISTR1*. The predicted miRNA response elements (MRE) in the 3'-UTR of the  
224 *MISTRV* paralog, *MISTR1*, is a predicted 8mer seed that is perfectly conserved out to fish genomes  
225 (Figure 4). In addition, 1) the 8mer has duplicated in some fish *MISTR1* orthologs (e.g. gar and  
226 medaka)(Figure 4) and 2) zebrafish maintains the predicted MRE for *miR-147b*.

227 Interestingly, the predicted MRE encoded by *MISTR1* overlaps with an MRE for an unrelated  
228 miRNA, *miR-210*. *miR-210* is highly upregulated by HIF1 $\alpha$  during low oxygen conditions and thought to  
229 be critical for the hypoxic response (Huang et al., 2009). Assays using a MRE reporter encoding the  
230 human *MISTR1* (*NDUFA4*) 3'-UTR (Bertero et al., 2012) support the functionality of this shared MRE, yet  
231 the significance has remained an open question. Evolutionary analysis indicates that the *miR-210* seed  
232 is perfectly conserved in bilateria for sequences sampled, with 19/22 nucleotides identical between the  
233 human and *Drosophila* orthologs (Figure 4) and 21/22 nts identical between human and fish orthologs.  
234 Thus, the *MISTR1* 3'-UTR encodes a highly conserved MRE potentially targeted by two distinct

235 ultraconserved miRNAs with an overlapping seed sequence; one of which is encoded by the paralog  
236 *MISTRAV*.

### 237 **MISTR1 is regulated by stress-inducible miRNAs**

238 TargetScan predicts seven MREs in the *MISTR1* 3'-UTR for six distinct miRNAs [*miR-7-5p*, *miR-*  
239 *145-5p* (2 sites), *miR-147b-3p*, *miR-202-5p*, *miR-205-5p* and *miR-210-3p*], which have seed sequences  
240 that are highly conserved in vertebrates with a subset extending in sequence conservation to bilateria  
241 (Figure 5A)(Bartel, 2018). MRE reporter assays using a luciferase reporter with the entire 1685 bp human  
242 *MISTR1* 3'-UTR (Figure 5B) revealed that transient co-transfection of either *miR-7-5p*, *miR-147b-3p*,  
243 *miR-210-3p* in HEK293T cells resulted in dramatic knockdown (40-65% of vector alone).  
244 Correspondingly, western blots with lysates from HEK293T and A549 cells transiently transfected with  
245 *miR-7-5p*, *miR-147b-3p*, *miR-210-3p* (Figure 5C) demonstrated knockdown of endogenous MISTR1  
246 protein. We identified two polyA signal canonical hexamers (AATAAA; 161-166, 1666-1671 relative to  
247 human 3'-UTR) in the *MISTR1* 3'-UTR that divides the first four MREs from the three downstream sites  
248 (Figure 5A). Interestingly, the miRNAs that did not result in knockdown are located downstream of the  
249 first polyA signal while those that did cause knockdown of targets are located upstream of the first polyA  
250 signal. Therefore, the *MISTR1* 3'-UTR encodes several predicted MREs for conserved miRNAs, of which  
251 a subset is functional in cell culture assays.

252 To test if MISTR1 is downregulated by stress, we performed western blots on lysates from A549  
253 WT and *MISTRAV* A549 KO cells treated with STS and/or interferon. We observed a progressive  
254 downregulation of MISTR1 following treatment with STS or STS/IFN- $\gamma$  compared to IFN- $\gamma$  alone (Figure  
255 5D). We also observed a nearly complete loss of MISTR1 in C15 $\Delta$ 3 mutant cells, which overexpress *miR-*  
256 *147b*. MISTR1 downregulation appears either specific or rapid in comparison to levels of the  
257 mitochondrial Complex II protein SDHA, which are largely unchanged under the same conditions (Figure  
258 5D). These data suggest loss of MISTR1 may promote apoptosis under conditions of stress. To test this  
259 hypothesis directly, we generated two MISTR1 KO A549 clonal cell lines (N21 and N31)(Figure 5, figure  
260 supplement 1). A control experiment showed that MISTR1 KO cells exhibit rates of proliferation similar  
261 to WT (Figure 5- figure supplement 1D). Assay of these cells following STS treatment using live-cell

262 analysis with the IncuCyte and western blot for cleaved PARP indicates that *MISTR1* KO cells are more  
263 sensitive to this apoptotic trigger compared to WT cells (Figure 5E, Figure 5-figure supplement 1E).

264 Next, we examined regulation of *MISTR1* in cells under hypoxic stress; a condition when *miR-*  
265 *210* and *MISTR1*'s paralog, *MISTRH* (Tello et al., 2011), are expressed. Following the induction of  
266 chemical hypoxia by deferoxamine mesylate (DFO) treatment in three cell lines, we observed  
267 downregulation of *MISTR1* concomitant with an upregulation of HIF1 $\alpha$ , *MISTRH* (Figure 5F), and *miR-*  
268 *210* (Figure 5G). Analysis of RCC4 kidney cancer cells with and without Von Hippel-Lindau (VHL) tumor  
269 suppressor indicate that the opposing expression of *MISTR1* and *MISTRH* requires HIF signaling (Figure  
270 5H). Thus, *MISTR1* is downregulated by ultraconserved stress-induced miRNAs under conditions when  
271 its paralogs are upregulated.

## 272 **A broad phylogenetic distribution of MISTR proteins**

273 To examine the implications of our findings in an evolutionary context, we characterized the breadth of  
274 *MISTR* proteins across eukaryotic genomes. While a recent study detected *MISTR1* homologs in yeasts,  
275 including Baker's and fission yeast, as well *Plasmodium* (Balsa et al., 2012), major gaps in the distribution  
276 and evolution of these proteins remain. We identified additional predicted proteins across animals and  
277 plants displaying homology to *MISTR* variants (Supplementary file 4). These data indicate *MISTR*AV,  
278 *MISTR1*, *MISTRH* sequences are conserved in vertebrate genomes with duplications present in the  
279 zebrafish genome for *MISTR1* and *MISTRH*; a phenomenon common to genes of teleost fish (Howe et  
280 al., 2013).

281 Maximum-likelihood phylogenetic analysis using PhyML (Guindon et al., 2010) of these AA  
282 sequences defines three major clades: A) vertebrate *MISTR*AVs, B) vertebrate *MISTR1* and *MISTRH*s  
283 as well as *Nematostella* and *Drosophila* proteins, and C) plant *MISTR*s along with algae and yeast  
284 proteins (Balsa et al., 2012). Low bootstrap values observed throughout the tree may be a consequence  
285 of the small length of *MISTR* sequences (*i.e.* too few characters) despite generating one-thousand trees  
286 for bootstrap analysis.

287 The clustering of v*MISTR*AV between the clade representing *MISTR*AV from mammals and  
288 lineages leading to chicken and zebrafish support the notion that v*MISTR*AV 1) likely originated from a

289 mammalian host in agreement with the primary host of squirrelpox (Darby et al., 2014) and diverged  
290 substantially after horizontal gene transfer and 2) is derived from host *MISTR*AV and not *MISTR*1 or  
291 *MISTR*H. A similar placement of *vMISTR*A from TetV-1 near *MISTR* sequence from the *Tetraselmis* algae  
292 protein (A0A061RM32) is also consistent with horizontal transfer from host to virus. Interestingly, the  
293 choanoflagellate *Salpingoeca rosetta* encodes two divergent *MISTR* homologs as evidenced by  
294 XP\_004989268.1 clustering with Clade B and XP\_004998377.1 clustering with Clade C. These data  
295 indicate that *MISTR* is widely distributed in genomes of diverse eukaryotes and has undergone repeated  
296 diversification, including ancestral duplications, as well as more recent evolutionary innovations.

### 297 ***vMISTR*AV antagonizes apoptotic responses**

298 Our data indicate a role for *MISTR* in cellular stress responses. To test the ability of *vMISTR*AV to  
299 counteract these responses, we engineered cells stably expressing the squirrelpox protein with a C-  
300 terminal HA epitope tag (Figure 7A). *vMISTR*AV-expressing cells grow at the same rate as control cells  
301 expressing an empty vector (EV) (Figure 7- figure supplement 1A). When *vMISTR*AV cells were treated  
302 with three activators of apoptosis – STS, actinomycin D (ActD), and camptothecin (CPT), we observed a  
303 protective effect of *vMISTR*AV as indicated by marked decreases in Caspase 3/7 activity (% apoptosis)  
304 (Figure 7C, Figure 7D, Figure 7E) as well as decreases in percentage of cleaved PARP (Figure 7- figure  
305 supplement 1B) compared to EV controls. We therefore conclude that the virus-encoded *vMISTR*AV  
306 inhibits apoptosis triggered by distinct mechanisms, consistent with a newly described host-pathogen  
307 conflict for control over the persistence of virus-infected cells.

## 308 **DISCUSSION**

### 309 ***MISTR*AV displays hallmarks of a critical immune defense function**

310 Here we characterized a combination of features common to crucial immune factors to discover  
311 how conserved, but mostly uncharacterized cellular proteins can mediate the key host defense process  
312 of apoptosis. It is known that a subset of ISGs provide critical defenses against invading pathogens  
313 (Schneider et al., 2014; Schoggins, 2014). However, of the more than 400 ISGs identified to date, the  
314 majority are poorly characterized (Schoggins et al., 2011; 2014). Therefore, a high priority of

315 immunological research is to assign functions, define interactions, and uncover regulatory mechanisms  
316 for this collection of vital gene products.

317 We define *MISTRAV* as an IFN- $\gamma$ -inducible gene (Figure 1D) and protein (Figure 3B), which builds  
318 on previous work showing that *MISTRAV* is induced by other immune signals: LPS, poly I:C, and  
319 PAM3SCK4 in primary mouse and human macrophage cell lines (Liu et al., 2009), LPS in human primary  
320 effector dendritic cells (Zimmer et al., 2012), and IFN- $\alpha$  (Schoggins et al., 2011). Several lines of evidence  
321 suggest that cellular *MISTRAV* is targeted for inactivation by multiple pathogens. Specifically, signatures  
322 of rapid evolution we detected in primate genomes for *MISTRAV* (Figure 2A, Figure 2D) point to repeated  
323 antagonistic interactions with pathogens on multiple protein surfaces. Although the precise functions of  
324 the three *MISTRAV* domains remain undefined (N-terminus, transmembrane domain, and C-terminus),  
325 all display evolutionary patterns consistent with genetic conflicts (Barber and Elde, 2014)(Elde et al.,  
326 2008; Sawyer et al., 2004). We predict that rapidly evolving surfaces on opposite sides of the TMEM,  
327 which may be otherwise shielded by the mitochondrial inner membrane, represent unique surfaces  
328 targeted by pathogen-encoded inhibitors.

329 While positive selection predicts direct inhibitors of *MISTRAV* and *MISTR1* functions, the  
330 presence of two viral homologs (*vMISTRAV* and *vMISTRA*) supports the idea that viruses also counteract  
331 this defense pathway via mimicry. Independent acquisition of related proteins by viruses that infect highly  
332 divergent hosts appears to be extremely rare with the largest evolutionary span thus far being distinct  
333 copies of IL-10 encoded by herpesviruses which infect fish and mammals (Ouyang et al., 2014). To our  
334 knowledge, these are the first ETC-associated genes known to be acquired by viruses. These  
335 observations indicate that the *MISTR* pathway provides a vital cellular defense that can influence the  
336 outcome of infections. Consistent with this idea, we demonstrate the ability of *vMISTRAV* to curb  
337 apoptotic responses from stimuli that function by distinct mechanisms (Figure 7). Notably, while  
338 *MISTRAV*, *OAS1* (Hancks et al., 2015; Mozzi et al., 2015), *cGAS*, *MX1* (Mitchell et al., 2012),  
339 *APOBEC3G* (Sawyer et al., 2004), *ZAP* (Daugherty et al., 2014; Kerns et al., 2008), *BST* (tetherin) (Lim  
340 et al., 2010; McNatt et al., 2009) and *PKR* (Elde et al., 2008) are all rapidly evolving and upregulated by

341 interferon, only MISTRV and OAS1 (Darby et al., 2014) homologs are known to be encoded in virus  
342 genomes.

### 343 **MISTR1 bridges the electron transport chain and stress responses**

344 MISTR1 has been shown to associate with ETC complexes and was presumed to act as a  
345 structural component of the complex, but additional functional roles are a matter of debate (Balsa et al.,  
346 2012; Kadenbach, 2017; Pitceathly and Taanman, 2018; Pitceathly et al., 2013). MISTR1 loss-of-function  
347 caused by a homozygous splice donor mutation is associated with the neurological disorder Leigh's  
348 syndrome (Pitceathly et al., 2013). MISTR1's annotation as NDUFA4 comes from initial findings that it  
349 co-purifies with Complex I (Carroll et al., 2006). More recent work provided evidence for a primary  
350 Complex IV association (Balsa et al., 2012). The presence of MISTR1 on the external surface (Figure  
351 2J) of Complex IV was interpreted as a means of regulating higher-order ETC complex formation into  
352 supercomplexes (Zong et al., 2018). Our data implicate downregulation of MISTR1 as a critical step for  
353 cells to respond to stresses, including pathogen infections (Figure 5). High levels of conservation of  
354 *MISTR1* MREs for *miR-210* and *miR-147b* (Figure 4) suggest the necessity of downregulating MISTR1  
355 during immune signaling and hypoxia (Figure 5).

### 356 **MISTR is a vertebrate specific stress response circuit**

357 Integrating evolutionary analysis with experimental genetics and related functional analysis led us to  
358 define a model for the Mitochondrial Stress Response circuit (MISTR)(Figure 7F). While some previous  
359 studies hinted at potential interactions for MISTR components, functional connections were largely  
360 unknown. For instance, *miR-147b* and *miR-210* were shown to share a seed sequence and these  
361 miRNAs can downregulate a MRE reporter encoding the *MISTR1* 3'-UTR when transfected (Bertero et  
362 al., 2012). In addition, *miR-147b* functions were recently associated with the TCA cycle (Zhang et al.,  
363 2019), but the observation that *miR-147b* was encoded by the same gene as a *MISTR1* paralog had not  
364 been reported (Bertero et al., 2012)(Figure 4). Likewise, the overexpression of endogenous MISTRH  
365 correlating with loss of MISTR1 protein (Figure 5H) has been observed in clear cell Renal Cell Carcinoma  
366 (ccRCC) tumor samples and ccRCC cell lines (Minton et al., 2016); a disease characterized by

367 hyperactive HIF signaling (Brugarolas, 2014), but the requirement of HIF in the regulation of this newly  
368 proposed circuit had not been tested (Figure 5H).

369 Our model predicts that MISTR1 is a ubiquitously expressed sensor of stress. Specific stress  
370 signals induce miRNA expression leading to the downregulation of MISTR1 and its replacement by  
371 inducible paralogs to facilitate apoptosis or some form of stress tolerance. Striking conservation of the  
372 miRNAs targeting *MISTR1* and cognate MREs (Figure 4) indicate MISTR-like responses are likely  
373 common in many diverse vertebrate species. In sharp contrast, MISTR<sub>AV</sub> is rapidly evolving near the C-  
374 terminus approximately only 80-100 bases upstream of the ultraconserved *miR-147b*.

375 The embedded nature of *miR-147b* implies a step-wise molecular progression of this response.  
376 Specifically, processing of *miR-147b* from the MISTR<sub>AV</sub> RNA, in principle, could uncouple the mRNA  
377 cap from the polyA tail rendering translation of MISTR<sub>AV</sub> infeasible. Consistent with this prediction and  
378 our findings, MISTR<sub>AV</sub> and *miR-147b* likely have related but separate functions (Figure 3). Furthermore,  
379 post-transcriptional mechanisms might also regulate mature *miR-147b* activity or its ability to target  
380 *MISTR1*. Strikingly, despite the high levels of *miR-147b* in C15Δ3 (Figure 3D), including at baseline, gross  
381 downregulation of MISTR1 - associated with the gain-of-function mutation in C15Δ3 - does not occur until  
382 STS is present (Figure 5D).

383 In contrast to MISTR<sub>AV</sub>/*miR-147b*, *miR-210* and *MISTRH* are encoded at distinct loci in an  
384 arrangement more permissive to complementary functions. However, *miR-210* is located within an intron  
385 of an uncharacterized non-coding RNA – called *miR-210HG* in humans. Here, processing of *miR-210*  
386 would not be predicted to inactivate the host gene. Therefore, *miR-210* and *miR-210HG* may share  
387 currently uncharacterized complementary functions. The distinct arrangements of *miR-147b* and *miR-*  
388 *210* are consistent with differences in cellular responses to hypoxia and infection. Namely, under hypoxia  
389 the cell will buffer itself from low-oxygen conditions enabling survival, while during infections there are  
390 more drastic, escalating levels of responses culminating in apoptosis to eliminate virus infected cells.  
391 Putting these findings together, the Mitochondrial Stress Response (MISTR) system represents an  
392 evolutionarily dynamic circuit interfacing with fundamental cellular processes to mediate stress responses  
393 that can be targeted by viruses.

## 394 **MATERIALS AND METHODS**

### 395 **Sequence analysis**

396 Domain searches were performed using Interpro (<https://www.ebi.ac.uk/interpro/>), NCBI Conserved  
397 Domains (<https://www.ncbi.nlm.nih.gov/Structure/cdd/wrpsb.cgi>), and TMHMM for transmembrane  
398 domain prediction (<http://www.cbs.dtu.dk/services/TMHMM/>).

### 399 **Rapid evolution analysis**

400 Primate nucleotide sequences were retrieved from the NCBI database (Supplementary file 1,  
401 Supplementary file 6). Multiple sequence alignments (MSA) were performed using Muscle in Geneious  
402 11.1.5 (BioMatters). Indels were removed from alignments by manual trimming. To obtain dN/dS lineage  
403 estimates, the MSA for each gene and newick phylogenetic tree of sampled primates [based on known  
404 relationships (Perelman et al., 2011)] served as input for FreeRatio analysis implemented in PAML (Yang,  
405 2007). PAML NSsites analysis was carried out with two codon frequency models F3X4 and F61. Analyses  
406 were also performed using MEME (Murrell et al., 2012) and FUBAR (Murrell et al., 2013) from  
407 Datamonkey ([datamonkey.org](http://datamonkey.org)) (Weaver et al., 2018) to predict rapidly evolving sites. Additional summary  
408 of findings is present in the Supplementary file 6.

### 409 **Phylogenetic Analysis**

410 MISTR amino acid sequences and related information were retrieved from NCBI, Uniprot, and (Balsa et  
411 al., 2012)(Supplementary file 4). Homologs for model species were selected for analysis. Multiple  
412 sequence alignment of amino acid sequences were performing using Muscle implemented in Geneious.  
413 Phylogenetic analysis was performed using PhyML. Model selection was performed by Smart Model  
414 Selection (SMS)(Lefort et al., 2017) integrated into PhyML. The LG +G model was selected for tree  
415 building using 1000 bootstrap replicates. FigTree v1.4.2 (<http://tree.bio.ed.ac.uk/software/figtree/>) was  
416 used for tree visualization.

### 417 **Cell lines**

418 HeLa, HL-60, L929, Raw 264.7, and HEK293T cell lines were obtained from ATCC. RCC4 (+/-) VHL cell  
419 lines were purchased from Sigma. A549 and U2OS cells were generous gifts from Dr. Susan Weiss at  
420 the University of Pennsylvania and Dr. Don Gammon at the University of Texas Southwestern Medical



421 Center, respectively. All cell lines except RCC4 were cultured in Corning DMEM with L-Gluatamine, 4.5  
422 g/L Glucose and Sodium Pyruvate supplemented with 10% FBS and 1X Gibco Antibiotic-Antimycotic  
423 solution. The Antibiotic-Antimycotic solution was replaced with 0.5 mg/mL G418 in the media for RCC4  
424 cells. All cell lines were maintained at 37°C in a humidified incubator at 5% CO<sub>2</sub>.

#### 425 **Cell culture treatments**

426 The following were added to cells at the indicated concentrations unless otherwise noted: Staurosporine  
427 [1 μM (Abcam)], Interferon Alpha [1000U/mL (PBL Assay Science)], Interferon Gamma [1000U/mL  
428 (ThermoFisher)], Actinomycin D [1 μg/mL (Cayman Chemical)], Camptothecin [1 μM (Tocris)],  
429 Deferoxamine mesylate [300 μM (Abcam)].

#### 430 **RT-PCR**

431 Total RNA was extracted using the *Quick*-RNA Miniprep Kit (Zymo) according to the manufacturer's  
432 instructions. 1μg of total RNA was reverse-transcribed using the Maxima First Strand cDNA Synthesis  
433 Kit (ThermoFisher) for 10 min at 25°C, 30 min at 50°C, 85°C 5 min. The 20 μL cDNA reaction was  
434 subsequently diluted with water to a final volume of 100 μL. 1-2 μL of cDNA was used for 25 μL PCR  
435 reactions using the GoTaq Hot Start Master Mix (Promega). Cycling parameters consisted of an initial  
436 denaturation of 95°C for 2 min., followed by 28-30 cycles of 95°C for 30s, 50°C for 30s, 72°C for 30s  
437 finishing with a final elongation of 72°C 2 min. 20 μL of each PCR product was resolved by 2% agarose  
438 gel electrophoresis and visualized using ethidium bromide.

#### 439 **CRISPR Knockouts**

440 For *MISTR*AV KOs, DNA oligos encoding guide RNAs (gRNA) were synthesized (IDT) and cloned into  
441 pSpCas9(BB)-2A-Puro vectors (gift from Feng Zhang, Addgene #62988) according to the protocol here  
442 (46). Guide RNAs were positioned in exon 2 (long isoform) with the expectation based on rules of  
443 nonsense-mediated decay such that frame-shifts here would be predicted to disrupt the *MISTR*AV ORF  
444 while maintaining expression of *miR-147b*. A549 cells were transfected with the gRNA construct, followed  
445 by puromycin (Invivogen) selection. Subsequently, limited dilution was performed to establish clonal cell  
446 lines. Clones of interest were identified by PCR on genomic DNA harvested with the *Quick*-DNA Miniprep

447 Kit (Zymo) from expanded cell lines using primers flanking exon 2 followed by Sanger sequencing of  
448 amplicons by Genewiz. For *MISTR1* KOs, guide RNAs (IDT) were transfected with Cas9 and tracrRNA  
449 from IDT into A549 cells. Clones were isolated via limiting dilution.

450 gRNAs were designed using [crispr.mit.edu](http://crispr.mit.edu) and [idt.com](http://idt.com)

#### 451 **vMISTRAV stable cell line**

452 vMISTRAV was synthesized (IDT) as a gene block with a C-terminal HA tag and cloned into pMSCV PIG  
453 (Puro IRES GFP empty vector) - a gift from David Bartel (Addgene plasmid # 21654). Retroviruses were  
454 generated using the retroPack system (Takara) according to manufacturer's instructions. Following  
455 infection of A549 cells, puro selection was performed to select for vMISTRAV-expressing cells.

#### 456 **Western Blot Analysis**

457 Cells were collected and lysed with RIPA Lysis and Extraction Buffer (ThermoFisher) supplemented with  
458 1X Halt Protease Inhibitor Cocktail (ThermoFisher). For the HIF1a Western blots, nuclear fractions were  
459 extracted using Abcam's Nuclear Fractionation Protocol. Cells cultured in 10-cm dishes were scraped in  
460 500  $\mu$ L of ice-cold Buffer A (10 mM HEPES, 1.5 mM MgCl<sub>2</sub>, 10 mM KCl, 0.5 mM DTT, 0.05% NP40, pH  
461 7.9, 1X Halt Protease Inhibitor Cocktail), transferred to 1.5 mL microcentrifuge tubes, and incubated on  
462 ice for 10 min. Lysates were centrifuged at 4°C at 3,000 rpm for 10 minutes. Each pellet was  
463 resuspended in 374  $\mu$ L ice-cold Buffer B (5 mM HEPES, 1.5 mM MgCl<sub>2</sub>, 0.2 mM EDTA, 0.5 mM DTT,  
464 26% glycerol (v/v), pH 7.9, 1X Halt Protease Inhibitor Cocktail) and 26  $\mu$ L of 4.6M NaCl (final NaCl  
465 concentration: 300 mM), homogenized using a syringe with a narrow-gauge needle (27G), and incubated  
466 on ice for 30 minutes. Lysates were centrifuged at 4°C at 24,000 x g for 20 min. The supernatant  
467 containing the nuclear fraction was transferred to a new tube. Protein concentrations of the extracts were  
468 measured using a Bradford assay. Protein samples were subjected to SDS-PAGE and wet-transferred  
469 to a 0.2  $\mu$ M Immobilon-PSQ PVDF membrane (Millipore) at 200 mA for 90 minutes. Membranes were  
470 blocked with blocking buffer (5% BSA or milk in TBST) for 1 hour at RT, and then incubated with primary  
471 antibodies at 4°C overnight. The following primary antibodies were used: SDHA (D6J9M) XP Rabbit  
472 mAB (CST), PARP (CST), NDUFA4 (ThermoFisher), IDO (Novus Biologicals), C15orf48 (Aviva Systems  
473 Biology), HA (Sigma), NDUFA4L2 (ThermoFisher), HIF1 $\alpha$  (Proteintech), HDAC1 (Proteintech),  $\beta$ -actin

474 (Sigma), and beta-3 Tubulin (ThermoFisher). Membranes were washed three times with TBST and then  
475 incubated with secondary antibodies for 1 hour at RT. Goat Anti-Rabbit IgG (Bio-Rad) and Goat Anti-  
476 Mouse IgG (Bio-Rad) were used as secondary antibodies. Membranes were washed three times with  
477 TBST and then incubated with Pierce ECL Plus Western Blotting Substrate (ThermoFisher). Blots were  
478 imaged using the ChemiDoc MP Imager (Bio-Rad).

#### 479 **miRNA qPCR**

480 Total RNA was extracted from cultured cells using the mirVana miRNA Isolation kit (Ambion) following  
481 the manufacturer's protocol. For each sample, 10 ng of total RNA was used as input for cDNA synthesis  
482 using the TaqMan Advanced miRNA cDNA Synthesis Kit (Thermofisher). *hsa-miR-147b-3p* and *hsa-*  
483 *miR-210-3p* levels were assessed by TaqMan Advanced miRNA Assays (Thermofisher) and TaqMan  
484 Fast Advanced miRNA master mix (Thermofisher). *hsa-mir-423-5p* (Thermofisher) served as  
485 endogenous control for analysis of miRNA expression. PCR was run in an Applied Biosystems  
486 QuantStudio 7 Real-Time PCR instrument following the manufacturer's instructions.

#### 487 **Cell-viability assays**

488 A549 cells were plated at  $1 \times 10^4$  cells/well in opaque white 96-well plates (Corning) in 100  $\mu$ L of media.  
489 24 hours later, spent medium was aspirated and replaced with 75  $\mu$ L of fresh media supplemented with  
490 1000 U/mL IFN- $\gamma$  (ThermoFisher). 24 hours following IFN- $\gamma$  addition, 25  $\mu$ L of media containing STS  
491 (Abcam) was added (final STS treatment concentration: 1  $\mu$ M). 16 hours later, cell viability was assessed  
492 using CellTiter-Glo (Promega) following the manufacturer's instructions.

#### 493 **IncuCyte analysis of Caspase 3/7 activity**

494 For experiments on the *MISTRAV* KO clones,  $5 \times 10^3$  cells were seeded and primed with IFN- $\gamma$  as above.  
495 24 hours post IFN- $\gamma$  addition, 25  $\mu$ L of media containing STS and CellEvent Caspase-3/7 Green Detection  
496 Reagent (ThermoFisher) at final treatment concentrations of 1  $\mu$ M and 2.5  $\mu$ M, respectively, was added.  
497 For experiments on the *MISTR1* KO and the v*MISTRAV* cell lines,  $5 \times 10^3$  cells/well were plated in opaque  
498 white 96-well plates (Corning) in 75  $\mu$ L of media. 24 hours later, 25  $\mu$ L of media containing the appropriate  
499 drug and Caspase-3/7 detection reagent was added (*MISTR1* KO cell lines: 1  $\mu$ M STS, 2.5  $\mu$ M CellEvent

500 Caspase-3/7 Green Detection Reagent; EV and vMISTRV cell lines: 1  $\mu$ M STS, 1  $\mu$ g/mL ActD, 1  $\mu$ M  
501 CPT, 5  $\mu$ M IncuCyte Caspase-3/7 Red Apoptosis Assay Reagent). To determine the cell number at the  
502 initial treatment timepoint, 25  $\mu$ L of media containing Vybrant DyeCycle Green Stain or SYTO 60 Red  
503 Fluorescent Nucleic Acid Stain (final concentration: 1  $\mu$ M) was added to a set of wells for each cell line.  
504 Plates were placed in an IncuCyte S3 Live-Cell Analysis System (Essen Bioscience) with a 10X objective  
505 in a standard cell culture incubator at 37°C and 5% CO<sub>2</sub>. Four images/well were collected every 2 hours  
506 in phase-contrast and fluorescence. The integrated object counting algorithm was used to count  
507 fluorescent objects/mm<sup>2</sup> for each time point. Percent apoptosis was determined by dividing the number  
508 of caspase-3/7 objects/mm<sup>2</sup> at each time point by the number of cells/mm<sup>2</sup> at the initial treatment  
509 timepoint.

#### 510 **Chemical Hypoxia Induction**

511 A day after plating cells in 6-well plates or 10-cm dishes, chemical hypoxia was induced by treating cells  
512 with 300  $\mu$ M DFO. 24 hours later cells were either collected in RIPA buffer or subjected to nuclear  
513 fractionation protocol as described above.

#### 514 **miRNA and MRE analysis**

515 Predicted MREs in MISTR1 were retrieved from Targetscan (Agarwal et al., 2015) and mirDB (Wong and  
516 Wang, 2015). miRNA and MISTR1 sequences were retrieved from NCBI (Supplementary file 6).

#### 517 **Transfection of miRNAs and miRNA reporter luciferase assays**

518 293T cells were seeded at 1 x 10<sup>4</sup> cells/well in opaque white 96-well plates (Corning) in 75 $\mu$ L of media.  
519 The next day, cells were transfected with 50 ng/well of the psiCHECK-2 (Promega) construct using the  
520 FuGENE HD Transfection Reagent (Promega), following the manufacturer's instructions. 24 hours later,  
521 cells were transfected with 1 pmol/well of miRNA mimics (ThermoFisher) using Lipofectamine RNAiMAX  
522 Transfection Reagent (ThermoFisher) according to manufacturer's instructions. The following miRNA  
523 mimics were used: *hsa-miR-210-3p*, *hsa-miR-7-5p*, *hsa-miR-202-5p*, *hsa-miR-145-5p*, *hsa-miR-205-5p*,  
524 *hsa-miR-147b-3p*, and Negative Control #1 (ThermoFisher). 48 hours after miRNA transfection, firefly  
525 and *Renilla* luciferase activities were measured using the Dual-glo Luciferase assay (Promega).

## 526 **Constructs**

527 hMISTRVAV-GFP and vMISTRP-GFP vectors were generated via PCR cloning. Briefly, hMISTRVAV and  
528 vMISTRVAV were synthesized as gBlocks (IDT), amplified using primers with KpnI and BamHI RE sites  
529 with Phusion Master Mix (NEB), digested, and ligated to N1-EGFP (Clontech) digested with KpnI and  
530 BamHI. Clones were confirmed by Sanger sequencing. Primer sequences available in Supplementary  
531 file 5.

532 Confocal Images. One day following transfection of either 1  $\mu$ g hMISTRVAV-GFP or 1  $\mu$ g vMISTRVAV-GFP,  
533 HeLa cells were fixed and stained with mitoTracker Red (Thermo). Images were taken in the confocal  
534 microscopy core at the University of Utah.

## 535 **Protein Modeling**

536 A recently published predicted structure of Complex IV (PDB:5Z62)(Zong et al., 2018), which contains  
537 MISTR1, was used for modeling. The structures of MISTR paralogs (MISTRVAV, MISTRH) were predicted  
538 using Swiss-Model (Waterhouse et al., 2018). UCSF Chimera  
539 (<https://www.cgl.ucsf.edu/chimera/>)(Pettersen et al., 2004) was used for visualization, mapping rapidly  
540 evolving sites, and analysis.

## 541 **Statistical analysis**

542 Experimental data are presented at means  $\pm$  SD. Statistical significance was determined by two-tailed  
543 unpaired student's t-test. GraphPad Prism software (Version 8.3.0) was used for statistical analysis.

544

## 545 **ACKNOWLEDGEMENTS**

546 We thank Malory Monson and Diane Downhour for technical assistance. We express gratitude to other  
547 members of the Hancks and Elde Labs as well as Don Gammon for feedback and discussion through  
548 the course of this project. We also thank Dan Propheter and Mike O'Donnell for comments on the  
549 manuscript.

## 550 **ADDITIONAL INFORMATION**

### 551 **Funding**

| Funder                                          | Grant reference number | Author           |
|-------------------------------------------------|------------------------|------------------|
| National Institute of General Medical Sciences  | 5R00GM119126-03        | Dustin C. Hancks |
| Cancer Prevention & Research Institute of Texas | RR170047               | Dustin C. Hancks |
| National Institute of General Medical Sciences  | R01GM114514            | Nels C. Elde     |
| Burroughs Wellcome Fund                         | 1015462                | Nels C. Elde     |
| HA and Edna Benning Presidential Endowment      |                        | Nels C. Elde     |

552

### 553 **Author Contributions**

554 Conceptualization, M.S., N.C.E, and D.C.H.; Methodology, M.S., N.C.E, and D.C.H.; Validation, M.S. and  
555 D.C.H.; Investigation, M.S., T.C., C.P., P.J., and D.C.H.; Resources, M.S., T.C., C.P., P.J., N.C.E. and  
556 D.C.H.; Writing – Original Draft, M.S. and D.C.H. ; Writing – Review & Editing, M.S., N.C.E., and D.C.H.;  
557 Visualization, M.S. and D.C.H.; Supervision, N.C.E. and D.C.H.; Funding Acquisition, N.C.E. and D.C.H.

558

### 559 **ADDITIONAL FILES**

#### 560 **Supplementary files**

561 Supplementary file 1. Nucleotide sequence information for rapid evolution analysis

562 Supplementary file 2. *miR-147b* target prediction output from miRDB

563 Supplementary file 3. *miR-147b* target prediction output from TargetScan

564 Supplementary file 4. Sequence information for evolutionary analysis of MISTR homologs

565 Supplementary file 5. Primers and oligos used in this study

566 Supplementary file 6. Supplementary file 6

567 Supplementary file 7. Key Resources Table

568

### 569 **REFERENCES**

570

571 Agarwal, V., Bell, G.W., Nam, J.-W., and Bartel, D.P. (2015). Predicting effective microRNA target sites  
572 in mammalian mRNAs. *Elife* 4, e05005.

573

574 Balsa, E., Marco, R., Perales-Clemente, E., Szklarczyk, R., Calvo, E., Landázuri, M.O., and Enríquez,  
575 J. (2012). NDUFA4 Is a Subunit of Complex IV of the Mammalian Electron Transport Chain. *Cell Metab*  
576 *16*, 378–386.

577

578 Barber, M.F., and Elde, N.C. (2014). Escape from bacterial iron piracy through rapid evolution of  
579 transferrin. *Science* *346*, 1362–1366.

580

581 Bartel, D.P. (2018). Metazoan MicroRNAs. *Cell* *173*, 20–51.

582

583 Bertero, T., Grosso, S., Robbe-Sermesant, K., Lebrigand, K., Hénaoui, I.-S., Puisségur, M.-P., Fourre,  
584 S., Zaragosi, L.-E., Mazure, N.M., Ponzio, G., et al. (2012). “Seed-Milarity” Confers to hsa-miR-210 and  
585 hsa-miR-147b Similar Functional Activity. *Plos One* *7*, e44919.

586

587 Bishop, M.J. (1985). Viral oncogenes. *Cell* *42*, 23–38.

588

589 Brugarolas, J. (2014). Molecular Genetics of Clear-Cell Renal Cell Carcinoma. *J Clin Oncol* *32*, 1968–  
590 1976.

591

592 Calvo, S.E., Clauser, K.R., and Mootha, V.K. (2016). MitoCarta2.0: an updated inventory of mammalian  
593 mitochondrial proteins. *Nucleic Acids Res* *44*, D1251–D1257.

594

595 Carroll, J., Fearnley, I.M., Skehel, M.J., Shannon, R.J., Hirst, J., and Walker, J.E. (2006). Bovine  
596 Complex I Is a Complex of 45 Different Subunits. *J Biol Chem* *281*, 32724–32727.

597

598 Darby, A.C., McInnes, C.J., Kjær, K., Wood, A.R., Hughes, M., Martensen, P., Radford, A.D., Hall, N.,  
599 and Chantrey, J. (2014). Novel Host-Related Virulence Factors Are Encoded by Squirrelpox Virus, the

- 600 Main Causative Agent of Epidemic Disease in Red Squirrels in the UK. *Plos One* 9, e96439.
- 601
- 602 Daugherty, M.D., and Malik, H.S. (2012). Rules of Engagement: Molecular Insights from Host-Virus  
603 Arms Races. *Annu Rev Genet* 46, 677–700.
- 604
- 605 Daugherty, M.D., Young, J.M., Kerns, J.A., and Malik, H.S. (2014). Rapid Evolution of PARP Genes  
606 Suggests a Broad Role for ADP-Ribosylation in Host-Virus Conflicts. *Plos Genet* 10, e1004403.
- 607
- 608 Elde, N.C., and Malik, H.S. (2009). The evolutionary conundrum of pathogen mimicry. *Nat Rev*  
609 *Microbiol* 7, 787.
- 610
- 611 Elde, N.C., Child, S.J., Geballe, A.P., and Malik, H.S. (2008). Protein kinase R reveals an evolutionary  
612 model for defeating viral mimicry. *Nature* 457, 485.
- 613
- 614 Floyd, B.J., Wilkerson, E.M., Veling, M.T., Minogue, C.E., Xia, C., Beebe, E.T., Wrobel, R.L., Cho, H.,  
615 Kremer, L.S., Alston, C.L., et al. (2016). Mitochondrial Protein Interaction Mapping Identifies Regulators  
616 of Respiratory Chain Function. *Mol Cell* 63, 621–632.
- 617
- 618 Guindon, S., Dufayard, J.-F., Lefort, V., Anisimova, M., Hordijk, W., and Gascuel, O. (2010). New  
619 Algorithms and Methods to Estimate Maximum-Likelihood Phylogenies: Assessing the Performance of  
620 PhyML 3.0. *Systematic Biol* 59, 307–321.
- 621
- 622 Hancks, D.C., Hartley, M.K., Hagan, C., Clark, N.L., and Elde, N.C. (2015). Overlapping Patterns of  
623 Rapid Evolution in the Nucleic Acid Sensors cGAS and OAS1 Suggest a Common Mechanism of  
624 Pathogen Antagonism and Escape. *Plos Genet* 11, e1005203.
- 625
- 626 Howe, K., Clark, M.D., Torroja, C.F., Torrance, J., Berthelot, C., Muffato, M., Collins, J.E., Humphray,



- 627 S., McLaren, K., Matthews, L., et al. (2013). The zebrafish reference genome sequence and its  
628 relationship to the human genome. *Nature* 496, 498.
- 629
- 630 Huang, X., Ding, L., Bennewith, K.L., Tong, R.T., Welford, S.M., Ang, K.K., Story, M., Le, Q.-T., and  
631 Giaccia, A.J. (2009). Hypoxia-Inducible mir-210 Regulates Normoxic Gene Expression Involved in  
632 Tumor Initiation. *Mol Cell* 35, 856–867.
- 633
- 634 Kadenbach, B. (2017). Regulation of Mammalian 13-Subunit Cytochrome c Oxidase and Binding of  
635 other Proteins: Role of NDUFA4. *Trends Endocrinol Metabolism* 28, 761–770.
- 636
- 637 Kane, M., Zang, T.M., Rihn, S.J., Zhang, F., Kueck, T., Alim, M., Schoggins, J., Rice, C.M., Wilson,  
638 S.J., and Bieniasz, P.D. (2016). Identification of Interferon-Stimulated Genes with Antiretroviral Activity.  
639 *Cell Host Microbe* 20, 392–405.
- 640
- 641 Kent, J.W., Sugnet, C.W., Furey, T.S., Roskin, K.M., Pringle, T.H., Zahler, A.M., and and Haussler, D.  
642 (2002). The Human Genome Browser at UCSC. *Genome Res* 12, 996–1006.
- 643
- 644 Kerns, J.A., Emerman, M., and Malik, H.S. (2008). Positive Selection and Increased Antiviral Activity  
645 Associated with the PARP-Containing Isoform of Human Zinc-Finger Antiviral Protein. *Plos Genet* 4,  
646 e21.
- 647
- 648 Lefort, V., Longueville, J.-E., and Gascuel, O. (2017). SMS: Smart Model Selection in PhyML. *Mol Biol*  
649 *Evol* 34, 2422–2424.
- 650
- 651 Li, Y., Banerjee, S., Wang, Y., Goldstein, S.A., Dong, B., Gaughan, C., Silverman, R.H., and Weiss,  
652 S.R. (2016). Activation of RNase L is dependent on OAS3 expression during infection with diverse  
653 human viruses. *Proc National Acad Sci* 113, 2241–2246.

654

655 Li, Y., Banerjee, S., Goldstein, S.A., Dong, B., Gaughan, C., Rath, S., Donovan, J., Korennykh, A.,  
656 Silverman, R.H., and Weiss, S.R. (2017). Ribonuclease L mediates the cell-lethal phenotype of double-  
657 stranded RNA editing enzyme ADAR1 deficiency in a human cell line. *Elife* 6, e25687.

658

659 Lim, E.S., Malik, H.S., and Emerman, M. (2010). Ancient Adaptive Evolution of Tetherin Shaped the  
660 Functions of Vpu and Nef in Human Immunodeficiency Virus and Primate Lentiviruses† ▽ . *J Virol* 84,  
661 7124–7134.

662

663 Liu, W., and Wang, X. (2019). Prediction of functional microRNA targets by integrative modeling of  
664 microRNA binding and target expression data. *Genome Biol* 20, 18.

665

666 Liu, G., Friggeri, A., Yang, Y., Park, Y.-J., Tsuruta, Y., and Abraham, E. (2009). miR-147, a microRNA  
667 that is induced upon Toll-like receptor stimulation, regulates murine macrophage inflammatory  
668 responses. *Proc National Acad Sci* 106, 15819–15824.

669

670 McLaughlin, R.N., and Malik, H.S. (2017). Genetic conflicts: the usual suspects and beyond. *J Exp Biol*  
671 220, 6–17.

672

673 McNatt, M.W., Zang, T., Hatzioannou, T., Bartlett, M., Fofana, I., Johnson, W.E., Neil, S.J., and  
674 Bieniasz, P.D. (2009). Species-Specific Activity of HIV-1 Vpu and Positive Selection of Tetherin  
675 Transmembrane Domain Variants. *Plos Pathog* 5, e1000300.

676

677 Minton, D.R., Fu, L., Mongan, N.P., Shevchuk, M.M., Nanus, D.M., and Gudas, L.J. (2016). Role of  
678 NADH Dehydrogenase (Ubiquinone) 1 Alpha Subcomplex 4-Like 2 in Clear Cell Renal Cell Carcinoma.  
679 *Clin Cancer Res* 22, 2791–2801.

680

- 681 Mitchell, P.S., Patzina, C., Emerman, M., Haller, O., Malik, H.S., and Kochs, G. (2012). Evolution-  
682 Guided Identification of Antiviral Specificity Determinants in the Broadly Acting Interferon-Induced  
683 Innate Immunity Factor MxA. *Cell Host Microbe* 12, 598–604.
- 684
- 685 Mozzi, A., Pontremoli, C., Forni, D., Clerici, M., Pozzoli, U., Bresolin, N., Cagliani, R., and Sironi, M.  
686 (2015). OASes and STING: Adaptive Evolution in Concert. *Genome Biol Evol* 7, 1016–1032.
- 687
- 688 Murrell, B., Wertheim, J.O., Moola, S., Weighill, T., Scheffler, K., and Pond, S.L. (2012). Detecting  
689 Individual Sites Subject to Episodic Diversifying Selection. *Plos Genet* 8, e1002764.
- 690
- 691 Murrell, B., Moola, S., Mabona, A., Weighill, T., Sheward, D., Pond, S.L., and Scheffler, K. (2013).  
692 FUBAR: A Fast, Unconstrained Bayesian AppRoximation for Inferring Selection. *Mol Biol Evol* 30,  
693 1196–1205.
- 694
- 695 Ouyang, P., Rakus, K., van Beurden, S.J., Westphal, A.H., Davison, A.J., Gatherer, D., and  
696 Vanderplasschen, A.F. (2014). IL-10 encoded by viruses: a remarkable example of independent  
697 acquisition of a cellular gene by viruses and its subsequent evolution in the viral genome. *J Gen Virol*  
698 95, 245–262.
- 699
- 700 Pagliarini, D.J., Calvo, S.E., Chang, B., Sheth, S.A., Vafai, S.B., Ong, S.-E., Walford, G.A., Sugiana, C.,  
701 Boneh, A., Chen, W.K., et al. (2008). A Mitochondrial Protein Compendium Elucidates Complex I  
702 Disease Biology. *Cell* 134, 112–123.
- 703
- 704 Perelman, P., Johnson, W.E., Roos, C., Seuánez, H.N., Horvath, J.E., Moreira, M.A., Kessing, B.,  
705 Pontius, J., Roelke, M., Rumpler, Y., et al. (2011). A Molecular Phylogeny of Living Primates. *Plos*  
706 *Genet* 7, e1001342.
- 707

708 Pettersen, E.F., Goddard, T.D., Huang, C.C., Couch, G.S., Greenblatt, D.M., Meng, E.C., and Ferrin,  
709 T.E. (2004). UCSF Chimera—A visualization system for exploratory research and analysis. *J Comput*  
710 *Chem* 25, 1605–1612.

711

712 Pitceathly, R., and Taanman, J.-W. (2018). NDUFA4 (Renamed COXFA4) Is a Cytochrome<em>-  
713 c</em> Oxidase Subunit. *Trends Endocrinol Metabolism* 29, 452–454.

714

715 Pitceathly, R., Rahman, S., Wedatilake, Y., Polke, J.M., Cirak, S., Foley, R.A., Sailer, A., Hurles, M.E.,  
716 Stalker, J., Hargreaves, I., et al. (2013). NDUFA4 Mutations Underlie Dysfunction of a Cytochrome c  
717 Oxidase Subunit Linked to Human Neurological Disease. *Cell Reports* 3, 1795–1805.

718

719 Sawyer, S.L., Emerman, M., and Malik, H.S. (2004). Ancient Adaptive Evolution of the Primate Antiviral  
720 DNA-Editing Enzyme APOBEC3G. *Plos Biol* 2, e275.

721

722 Schneider, W.M., Chevillotte, M., and Rice, C.M. (2014). Interferon-Stimulated Genes: A Complex Web  
723 of Host Defenses. *Annu Rev Immunol* 32, 513–545.

724

725 Schoggins, J.W. (2014). Interferon-stimulated genes: roles in viral pathogenesis. *Curr Opin Virol* 6, 40–  
726 46.

727

728 Schoggins, J.W., Wilson, S.J., Panis, M., Murphy, M.Y., Jones, C.T., Bieniasz, P., and Rice, C.M.  
729 (2011). A diverse range of gene products are effectors of the type I interferon antiviral response. *Nature*  
730 472, 481.

731

732 Schoggins, J.W., MacDuff, D.A., Imanaka, N., Gainey, M.D., Shrestha, B., Eitson, J.L., Mar, K.B.,  
733 Richardson, B.R., Ratushny, A.V., Litvak, V., et al. (2014). Pan-viral specificity of IFN-induced genes  
734 reveals new roles for cGAS in innate immunity. *Nature* 505, 691.

735

736 Siepel, A., Bejerano, G., Pedersen, J.S., Hinrichs, A.S., Hou, M., Rosenbloom, K., Clawson, H., Spieth,  
737 J., Hillier, L.W., Richards, S., et al. (2005). Evolutionarily conserved elements in vertebrate, insect,  
738 worm, and yeast genomes. *Genome Res* 15, 1034–1050.

739

740 Spector, D., Varmus, H., and Bishop, J. (1978). Nucleotide sequences related to the transforming gene  
741 of avian sarcoma virus are present in DNA of uninfected vertebrates. *Proc National Acad Sci* 75, 4102–  
742 4106.

743

744 Tello, D., Balsa, E., Acosta-Iborra, B., Fuertes-Yebra, E., Elorza, A., Ordóñez, Á., Corral-Escariz, M.,  
745 Soro, I., López-Bernardo, E., Perales-Clemente, E., et al. (2011). Induction of the Mitochondrial  
746 NDUFA4L2 Protein by HIF-1 $\alpha$  Decreases Oxygen Consumption by Inhibiting Complex I Activity. *Cell*  
747 *Metab* 14, 768–779.

748

749 Waterhouse, A., Bertoni, M., Bienert, S., Studer, G., Tauriello, G., Gumienny, R., Heer, F.T., de Beer,  
750 T., Rempfer, C., Bordoli, L., et al. (2018). SWISS-MODEL: homology modelling of protein structures  
751 and complexes. *Nucleic Acids Res* 46, gky427-.

752

753 Weaver, S., Shank, S.D., Spielman, S.J., Li, M., Muse, S.V., and Pond, S.L. (2018). Datamonkey 2.0: A  
754 Modern Web Application for Characterizing Selective and Other Evolutionary Processes. *Mol Biol Evol*  
755 35, 773–777.

756

757 Wong, N., and Wang, X. (2015). miRDB: an online resource for microRNA target prediction and  
758 functional annotations. *Nucleic Acids Res* 43, D146–D152.

759

760 Yang, Z. (2007). PAML 4: Phylogenetic Analysis by Maximum Likelihood. *Mol Biol Evol* 24, 1586–1591.

761

762 Zhang, W., Wells, J.M., Chow, K.-H., Huang, H., Yuan, M., Saxena, T., Melnick, M., Politi, K., Asara,  
763 J.M., Costa, D.B., et al. (2019). miR-147b-mediated TCA cycle dysfunction and pseudohypoxia initiate  
764 drug tolerance to EGFR inhibitors in lung adenocarcinoma. *Nat Metabolism* 1, 460–474.  
765  
766 Zhou, J., Wang, H., Lu, A., Hu, G., Luo, A., Ding, F., Zhang, J., Wang, X., Wu, M., and Liu, Z. (2002). A  
767 novel gene, NMES1, downregulated in human esophageal squamous cell carcinoma. *Int J Cancer* 101,  
768 311–316.  
769  
770 Zimmer, A., Bouley, J., Mignon, M., Pliquet, E., Horiot, S., Turfkruyer, M., Baron-Bodo, V., Horak, F.,  
771 Nony, E., Louise, A., et al. (2012). A regulatory dendritic cell signature correlates with the clinical  
772 efficacy of allergen-specific sublingual immunotherapy. *J Allergy Clin Immun* 129, 1020–1030.  
773  
774 Zong, S., Wu, M., Gu, J., Liu, T., Guo, R., and Yang, M. (2018). Structure of the intact 14-subunit  
775 human cytochrome c oxidase. *Cell Res* 28, 1026–1034.  
776

## 777 **FIGURE LEGENDS**

778 **Figure 1. MISTRAV is a small interferon gamma-stimulated mitochondrial factor also encoded by**  
779 **divergent viruses. A)** Diagram of *MISTRAV* with predicted domains indicated. Colored domain  
780 represents B12D, NADH: ubiquinone reductase complex I MLRQ subunit family (pfam:06522).  
781 Transmembrane predicted using TMHMM (<http://www.cbs.dtu.dk/services/TMHMM/>). **B)** Diagram of  
782 *vMISTRAV*, the *MISTRAV* homolog encoded by squirrelpox, annotated with predicted domains. **C)**  
783 Diagram of *vMISTRA*, the *MISTR* homolog identified in the genome of a giant virus which infects algae.  
784 **D)** RT-PCR using cDNA produced from RNA from interferon-treated human and mouse cell lines. *BST2*,  
785 *AIM2*, *IFI16*, *GBP11*, and *OAS2L* are interferon-stimulated gene (ISG) controls. **E)** Confocal images of  
786 HeLa cells transfected with constructs encoding *MISTRAV*- or *vMISTRAV*-GFP. Mitochondrial STress  
787 Response AntiViral (*MISTRAV*), viral *MISTRAV* (*vMISTRAV*), viral *MISTR* Algae (*vMISTRA*).  
788

789 **Figure 1- figure supplement 1:** Sequence analysis of Tetraselmis virus 1 MISTR (vMISTRA). **A)** Clustal  
790 omega amino acid alignment of Tetraselmis virus 1 MISTR with three Tetraselmis MISTR protein  
791 sequences from the database. **B)** blastp analysis of Tetraselmis virus 1 MISTR - Query - with Tetraselmis  
792 MISTR (A0A061RM32) - Subject.

793

794 **Figure 2: Rapid evolution of MISTRAV and its paralog MISTR1 in primate genomes.** Estimated  
795 dN/dS values predicted using FreeRatio analysis in PAML (Yang, 2007) across primate lineages for **A)**  
796 *MISTRAV*, **B)** *MISTR1*, and **C)** *MISTRH*. Rapidly evolving lineages (dN/dS > 1 or greater than or equal  
797 to 3 nonsynonymous amino acid substitutions: synonymous amino acid substitutions) are marked by red  
798 branches. **D)** *MISTRAV* **E)** *MISTR1*, and **F)** *MISTRH* amino acid positions predicted to be rapidly evolving  
799 (colored triangles) from PAML, MEME (Murrell et al., 2012), and FUBAR (Murrell et al., 2013) analysis.  
800 Numbering and residue are relative to the human reference sequence. Rapidly evolving sites for **G)**  
801 *MISTRAV* (red) **H)** *MISTR1* (red), and **I)** *MISTRH* (yellow) mapped onto the predicted structure of  
802 MISTR1. Models were generated using SWISS-MODEL (<https://swissmodel.expasy.org/>) based on the  
803 published structure of Complex IV of the electron transport chain containing MISTR1/NDUFA4  
804 (PDB:5Z62)(Zong et al., 2018). **J)** Model of MISTRAV (blue) within Complex IV structure (silver).

805

806 **Figure 2- figure supplement 1:** MISTR factors are conserved in vertebrates. Clustal omega amino acid  
807 alignment of MISTRAV, MISTR1, and MISTRH sequences. Hs - *Homo sapiens* (Human), Mm - *Mus*  
808 *musculus* (mouse), Dr - *Danio rerio* (zebrafish), Lo - *Lepisosteus oculatus* (spotted-gar). Accession  
809 numbers are for NCBI.

810

811 **Figure 3: Loss-of-function analysis reveals a role for MISTRAV and its embedded miRNA – miR-**  
812 **147b – in apoptosis.** **A)** Diagram of the *MISTRAV* locus from the UCSC genome browser  
813 (<http://genome.ucsc.edu/>)(Kent et al., 2002). Two major transcripts are predicted for *MISTRAV*, which we  
814 term short (5 exons/predicted mRNA length 732 nt) and long (4 exons/predicted mRNA length 875 nt).  
815 The location of *pre-mir-147b* is marked by the blue box below predicted protein-coding mRNAs.

816 Sequences of CRISPR-induced mutations targeted to exon 2 (relative to the long isoform of *MISTRAV*)  
817 in A549 cells, which result in predicted frameshifts. Deleted nucleotides are indicated by hyphen (-) and  
818 inserted nucleotide is highlighted in red. **B)** Western blot analysis using protein lysates from IFN- $\gamma$  treated  
819 A549 cells and *MISTRAV* deletion clones. IDO1 is an ISG control (Kane et al., 2016). **C)** RT-PCR analysis  
820 using primers (horizontal blue arrows) in **A)** on cDNA produced from total RNA extracted from IFN- $\gamma$ -  
821 treated A549 WT and *MISTRAV* KO cells. **D)** *miR-147b* Taqman qPCR using RNA extracted from A549  
822 WT and mutant cell lines treated with IFN- $\gamma$ , STS, or both for 16 hours. *miR-423* was used as the  
823 endogenous control. Fold changes in *miR-147b* levels are relative to the *miR-147b* level in WT untreated  
824 cells. Data represent means  $\pm$  SD (n= 3 replicates). **E)** Experimental timeline of apoptosis assays using  
825 WT and mutant A549 cells. **F)** CellTiter Glo (luciferase-based) cell viability assay on WT and mutant cells  
826 treated with IFN- $\gamma$ , STS, or both for 16 hours. Data represent means  $\pm$  SD (n= 3 replicates). **G)** Percent  
827 apoptosis of A549 WT and *MISTRAV* KO cells pre-treated with IFN- $\gamma$  for twenty-four hours followed by  
828 STS treatment for 16 hours; Caspase 3/7 activity was normalized to the number of cells at the initial  
829 treatment timepoint measured by IncuCyte. Data represent means  $\pm$  SD (n= 3 replicates). Statistical  
830 significance was determined by a two-tailed unpaired t-test, \*\*\*\*p $\leq$ 0.0001. **H)** Western blot analysis of  
831 cleaved PARP in WT and *MISTRAV* KO cells treated with IFN- $\gamma$  and STS. SDHA serves as loading  
832 control. Densitometry analysis of PARP levels was performed using Image Lab version 6.0.1 (Bio-Rad).  
833 % Cleaved PARP= (cleaved PARP/(Full + Cleaved PARP)) \* 100. IFN- $\gamma$  – interferon gamma, STS –  
834 staurosporine.

835

836 **Figure 3- figure supplement 1:** Proliferation rates of A549 C15 (*MISTRAV* KO) knockout clonal lines  
837 measured using IncuCyte. Changes in % confluence were used as a surrogate marker of cell  
838 proliferation. Data represent means  $\pm$  SD (n=6 replicates).

839

840 **Figure 4: Ultraconserved miRNAs are predicted to target a vertebrate-specific miRNA response**  
841 **element in *MISTR1*.** Human *MISTRAV*, *mir210HG*, and *MISTR1* loci with predicted gene structures and



842 PhastCons [green peaks (Siepel et al., 2005)] track from the UCSC genome browser are shown.  
843 Orthologous sequences were retrieved from the NCBI sequence database (Supplementary file 6).  
844 Predicted seeds and miRNA response element (MRE) are marked by salmon-colored boxes.

845

846 **Figure 4- figure supplement 1:** Zebrafish lack intact *miR-147b*. Clustal omega nucleotide alignment of  
847 *MISTRAV* 3'-UTR sequences. Alignment starts with *MISTRAV* stop codon. Predicted *pre-mir-147b* (blue)  
848 relative to human annotation, predicted *miR-147b* (red). Hs - *Homo sapiens* (Human), Mm - *Mus*  
849 *musculus* (mouse), Dr - *Danio rerio* (zebrafish), Lo - *Lepisosteus oculatus* (spotted-gar). Accession  
850 numbers are for NCBI.

851

852 **Figure 5. MISTR1 is a target of multiple conserved miRNAs, ubiquitously expressed, and**  
853 **downregulated by stress. A)** Diagram of predicted MREs in the full-length human *MISTR1* 3'-UTR.  
854 Numbering is relative to the first nucleotide downstream of the stop codon for the *MISTR1* human  
855 reference sequence. MREs are colored by miRNA seed conservation determined by (Bartel, 2018):  
856 bilateria (blue) and vertebrate (red). Identified core polyA signal sequence motifs (5'-AATAAA-3') are  
857 highlighted. **B)** miRNA reporter assays for miRNAs predicted to target *MISTR1*. psiCheck2 encoding the  
858 full-length human *MISTR1* 3'-UTR and candidate miRNAs were sequentially transfected into HEK293T  
859 cells followed by luciferase assays. Data represent means  $\pm$  SD (n= 3 replicates). **C)** Western blot for  
860 endogenous *MISTR1* levels in HEK293T and A549 using lysates from cells transfected with miRNAs  
861 predicted to bind the *MISTR1* 3'-UTR. **D)** Western blot for endogenous *MISTR1* levels using lysates from  
862 A549 WT or *MISTRAV* KO cells treated with IFN- $\gamma$ , STS, or both for 16 hours.  $\alpha$ -SDHA blot serves as a  
863 control for mitochondrial protein stability. **E)** Percent apoptosis of A549 WT and *MISTR1* KO cells treated  
864 with STS; Caspase 3/7 activity was normalized to the number of cells at the initial treatment timepoint  
865 measured by IncuCyte. Data represent means  $\pm$  SD (n= 3 replicates). Statistical significance was  
866 determined by a two-tailed unpaired t-test, \*\*\*\*p $\leq$ 0.0001. **F)** Western blot analysis of *MISTR1* and  
867 *MISTRH* levels 24 hours after chemical hypoxia induction by DFO. The upper band in the DFO-treated  
868 HeLa lane in the  $\alpha$ -*MISTR1* blot is *MISTRH*. SDHA – mitochondrial control, nuclear HIF1 $\alpha$  – hypoxia

869 control, HDAC1 – nuclear protein control. **G)** *miR-210* Taqman qPCR of cell lines in **F)** following 24 hours  
870 of DFO treatment. *miR-423* was used as the endogenous control. Fold changes in *miR-210* levels in  
871 DFO-treated cells are relative to the *miR-210* level in untreated cells. Data represent means  $\pm$  SD (n= 3  
872 replicates). **H)** Western blot analysis of MISTR1 and MISTRH levels in the RCC4 kidney cancer cell line  
873 with or without stable rescue expression of Von Hippel Lindau (VHL). The upper band in the RCC4 (-  
874 VHL) lane in the  $\alpha$ -MISTR1 blot is MISTRH. IFN- $\gamma$  – interferon gamma, STS – staurosporine, DFO –  
875 deferoxamine mesylate.

876

877 **Figure 5- figure supplement 1:** Generation and characterization of *MISTR1* KO A549 cells. **A)**  
878 CRISPR/CAS deletion strategy for *MISTR1*. Scissors indicate relative locations of guide RNAs designed  
879 to target sequences flanking exon 2 of this gene. The exon 2 deletion strategy was employed for ease of  
880 genotyping. Gene structure from UCSC genome browser. Sequences of breakpoints identified a 225bp  
881 deletion that included exon 2. Note identical repaired breakpoints were recovered for both clones. **B)**  
882 Agarose gel resolving amplicons from genotyping PCR of A549 KO clones. **C)** Western blot analysis  
883 using lysates from WT and *MISTR1* KO clones. **D)** Measurement of proliferation rates using IncuCyte for  
884 *MISTR1* KO A549 cell line. Changes in % confluence were used as a surrogate marker of cell  
885 proliferation. Data represent means  $\pm$  SD (n=6 replicates). **E)** Western blot analysis of cleaved PARP  
886 levels using lysates from WT and *MISTR1* KO cells following 16 hours of STS treatment. Densitometry  
887 analysis of PARP levels was performed using Image Lab version 6.0.1 (Bio-Rad). % Cleaved PARP=  
888 (cleaved PARP/(Full + Cleaved PARP)) \* 100. STS - staurosporine.

889

890 **Figure 6: A broad phylogenetic distribution of MISTR sequences.** An inferred tree built using MISTR  
891 amino acid sequences by maximum-likelihood analysis using PhyML (Guindon et al., 2010)  
892 (<http://www.atgc-montpellier.fr/phyml/>) with the LG +G model and 1000 bootstraps. Sequences were  
893 extracted from the NCBI sequence database, Uniprot (<https://www.uniprot.org/>) and (Balsa et al., 2012)  
894 (Supplementary file 4). Bootstrap percentages from analysis are placed at nodes. Scale for amino acid  
895 substitutions per site – bottom left.

896

897 **Figure 7: Mitochondrial Stress Response Circuit (MISTR) Model. **A**) Western blot for vMISTRAV-  
898 HA using lysates from stably-expressing cells. EV – empty vector. **B**) Apoptosis assay timeline for  
899 vMISTRAV cells. Percent apoptosis and phase contrast images of EV and vMISTRAV-expressing cells  
900 following treatment with distinct activators of apoptosis: **C**) staurosporine (STS), **D**) actinomycin D (ActD),  
901 and **E**) camptothecin (CPT). Phase contrast images were taken 16 hours after treatment with STS or  
902 ActD and 24 hours after treatment with CPT. Caspase 3/7 activity was normalized to the number of cells  
903 at the initial treatment timepoint measured by IncuCyte. Percent apoptosis data represent means  $\pm$  SD  
904 (n= 4 replicates). Statistical significance was determined by a two-tailed unpaired t-test, \*\*\*\*p $\leq$ 0.0001 **F**)  
905 Schematic diagram of a MISTR network shows proposed interactions between the electron transport  
906 chain complexes and vertebrate MISTR proteins (MISTRAV, MISTR1, MISTRH, vMISTRAV). MISTR loci  
907 and RNA produced from them including *miR-147b* and *miR-210* are also illustrated. Using the example  
908 of infection as a stressor, *MISTRAV* transcription is induced by interferon (Figure 1D, Figure 3B) resulting  
909 in the production of MISTRAV RNA. MISTRAV protein localizes to the mitochondria (Figure 1E), to  
910 promote host defense. In the model, *miR-147b* production acts to inactivate MISTRAV translation and  
911 downregulate MISTR1 to facilitate the apoptotic response (Figure 3 and Figure 5). Virus encoded variants  
912 (vMISTRAV) counteract the response by inhibiting apoptosis through resemblance to MISTR  
913 components. In the case of hypoxic stress, *MISTRH* and *mir-210HG* are transcribed from distinct loci to  
914 produce MISTRH (Tello et al., 2011), which can inhibit Complex I activity (dashed red line), while *miR-*  
915 *210* (Huang et al., 2009) downregulates MISTR1 to facilitate the cellular hypoxic response. Rapid  
916 evolution of *MISTRAV* and *MISTR1* (Figure 2) is highlighted by yellow stars. Blue dashed lines from  
917 MISTRAV indicate potential ETC complex interactions from published data including protein-protein  
918 interactions proposed from mass spec analysis (Floyd et al., 2016). Although MISTR proteins may be  
919 embedded components in the mitochondrial inner membrane undergoing stress regulated and miRNA-  
920 mediated exchanges, they are shown as circles for clarity in the model.**

921

922 **Figure 7- figure supplement 1:** Characterization of WT A549 cells stably-expressing vMISTRV. **A)**  
923 Proliferation rates of empty vector (EV) and vMISTRV-expressing cells measured using IncuCyte.  
924 Changes in % confluence were used as a surrogate marker of cell proliferation. Data represent means  
925  $\pm$  SD (n=6 replicates). **B)** Western blot analysis of cleaved PARP levels using lysates from EV and  
926 vMISTRV-expressing cells following treatment with activators of apoptosis. STS - staurosporine, ActD  
927 - actinomycin D, CPT - camptothecin. Lysates were collected 16 hours after treatment with STS or ActD  
928 and 24 hours after treatment with CPT. Densitometry analysis of PARP levels was performed using Image  
929 Labversion 6.0.1 (Bio-Rad). % Cleaved PARP= (cleaved PARP/(Full + Cleaved  
930 PARP)) \* 100.

**Sorouri et al. Figure 1**

**A) human MISTRAV**

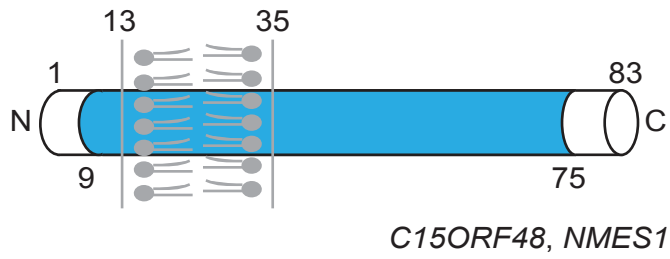

**B) vMISTRAV**

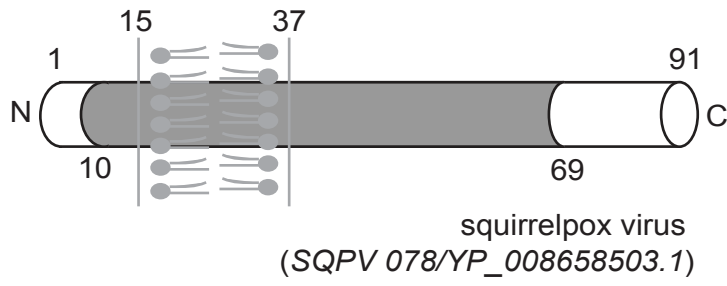

**C) vMISTRA**

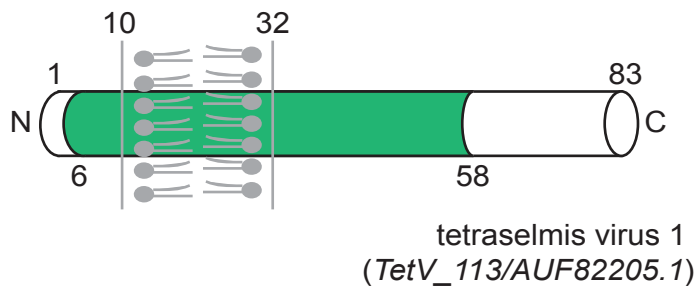

**D)**

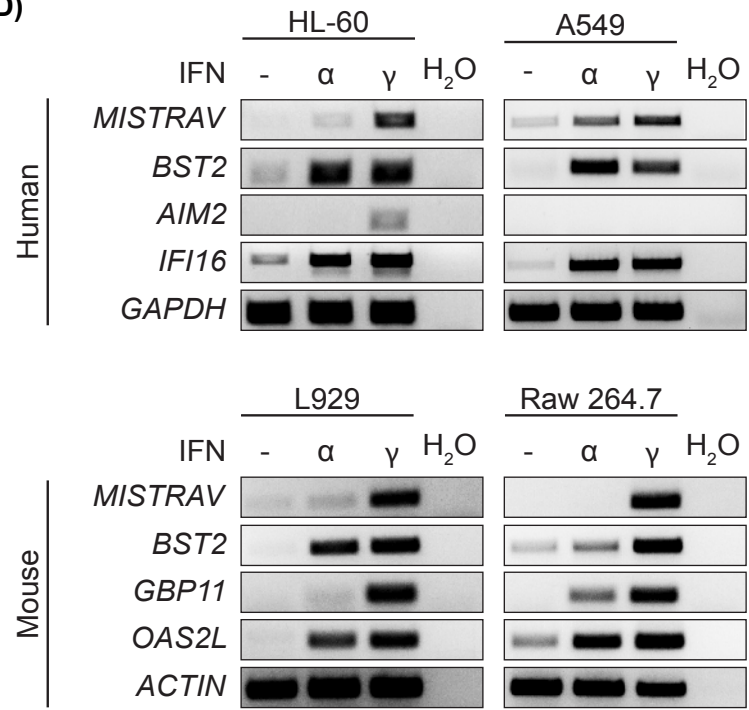

**E)**

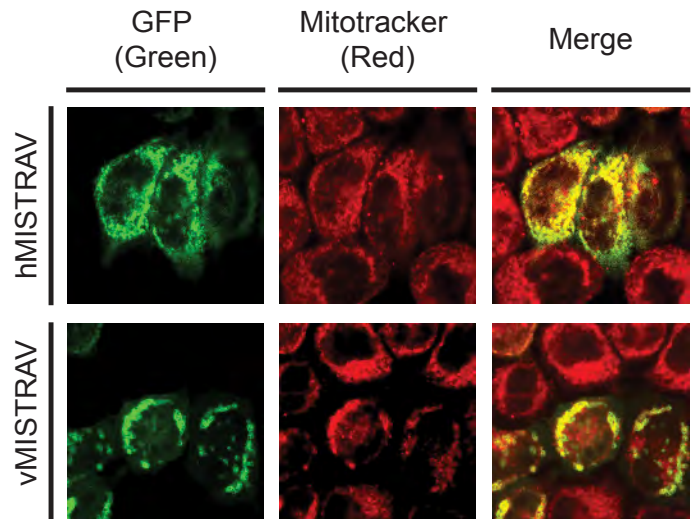

**Sorouri et al. Figure 1- figure supplement 1**

**A)**

|                       |                                                              |     |
|-----------------------|--------------------------------------------------------------|-----|
| TetV_113/AUF82205.1   | -----                                                        | 0   |
| A0A061RM32Tetraselmis | EIHGIQGAQQEGYQKLGQGGWYFQTKSISG--RSFRSRCLFPPFP-----AHC-IFDH   | 50  |
| A0A061R6K4Tetraselmis | -----KRSLNILSLSLNLRLRIRAVTKPIREYSQPRKGELQLKLS                | 38  |
| A0A061S3J4Tetraselmis | -----M                                                       | 1   |
|                       |                                                              |     |
| TetV_113/AUF82205.1   | -----MFPRPKPEVYPLIVAVSTGIGMMFYAGARSLYTSGDVAVYKSDRG-LKMSGEY-  | 52  |
| A0A061RM32Tetraselmis | SDMSRQFSRWLVPEAAPLALAVGGALTMMTYTAFRSFYSTGDVMLNKKDRENFKTTEEL- | 109 |
| A0A061R6K4Tetraselmis | YMSGRTRFSWLAEEAYPLFVTVGAGCFAGAFQLVRFSSPNAQTNKEATRKQAIPEDPQ   | 98  |
| A0A061S3J4Tetraselmis | ASAGAKKFSWMAVEAYPLFVTVGGGVLLCAFQLARCATQNPDKLLK-TTRTECIPETWD  | 60  |
|                       | * . ** : :* . .           :   *       . : .   *              |     |
|                       |                                                              |     |
| TetV_113/AUF82205.1   | -----NPYKEYGLKDHNSYFKKIGDY-----WPWPHYKGD-----                | 83  |
| A0A061RM32Tetraselmis | -----NVSSDWGV-----                                           | 117 |
| A0A061R6K4Tetraselmis | KLVEAERYRDHALRRLSLKYGGDAGIFSTLNKHMSKPQDEQGTYSSS              | 145 |
| A0A061S3J4Tetraselmis | AERSGRTFHDHAVRRFLRDYAG-AGILKTLNIEMSKPRI-----                 | 98  |

**B)**

Score = 43.5 bits (101), Expect = 5e-12, Method: Compositional matrix adjust.  
 Identities = 22/55 (40%), Positives = 31/55 (56%), Gaps = 1/55 (2%)

|       |    |                                                         |     |
|-------|----|---------------------------------------------------------|-----|
| Query | 7  | PEVYPLIVAVSTGIGMMFYAGARSLYTSGDVAVYKSDR-GLKMSGEYNPYKEYGL | 60  |
|       |    | PE PL +AV + MM Y RS Y++GDV + K DR K + E N ++G+          |     |
| Sbjct | 63 | PEAAPLALAVGGALTMMTYTAFRSFYSTGDVMLNKKDRENFKTTEELNVSSDWGV | 117 |

**Sorouri et al. Figure 2**

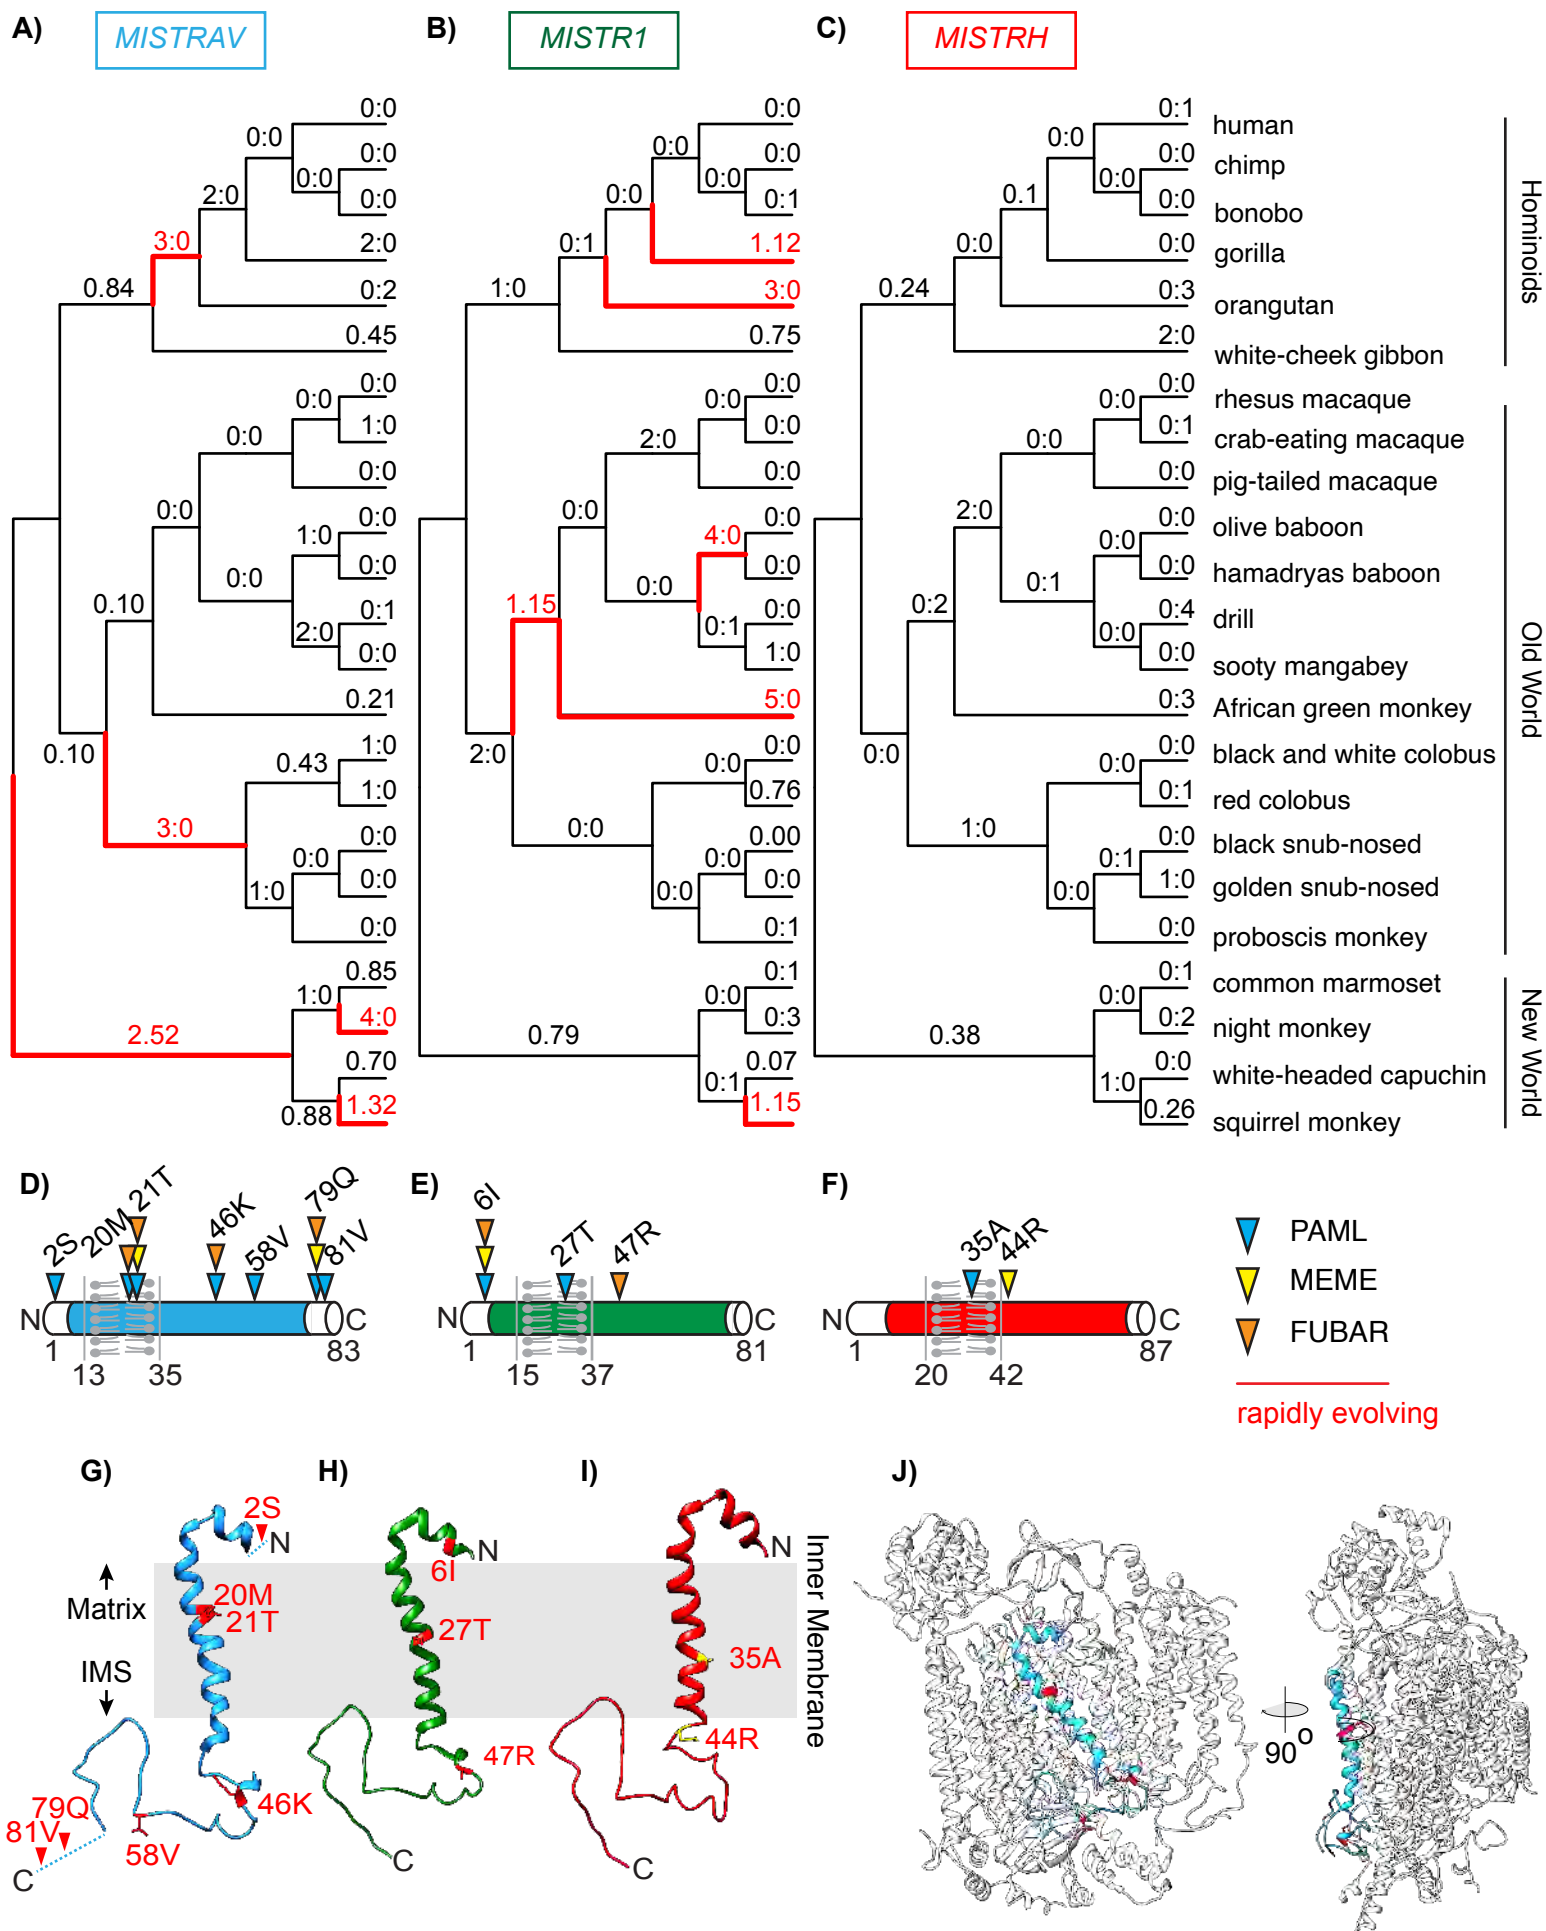

## Sorouri *et al.* Figure 2- figure supplement 1

A)

```
HsMISTRV(NP_115789.1) -----MSFFQLMKRRELIPLVVFMVAAGASSFAVYS-LWKT DVILDRKKNPEPWE 52
MmMISTRV(NP_001004174.1) -----MGVVFQILMKNKELIPLAFFISVAATGATSFALYA-LKKT DVVIDRKRKNPEPWE 52
DrMISTRV(NP_001185677.1) -----MNGGLIQLLRKRKELIPLLLGIVSCAAFATTMIYFLLTKPDVILNKTGNPEPWE 55
LoMISTRV(XP_006628702.1) -----MSAFFQLMKRKKELIPLIGIMTFAATGATTACLYFLFTKSDVIINKAGNPEPWE 54
HsMISTR1(NP_002480.1) -----MLRQIIIGQAKKHPSLIPLVFVFIGTGATGATLYLLRLLALFNPDVDCWDR-NNPEPWN 54
MmMISTR1(NP_035016.1) -----MLRQILGQAKKHPSLIPLVFVFIGAGGTGAALYVMRLALFNPDVSWDRKKNPEPWN 55
DrMISTR1(NP_998190.1) -----MLATVMKQLKSHPALIPLFIFIGGGATMSMLYLGRLLALKNPDVSWDRKKNPEPWN 55
DrMISTR1L(NP_998582.1) -----MLSMVSRQLRSHPALIPLFIFIGGGCTMSLSYLARLALRNPVCWDRKKNPEPWN 55
LoMISTR1(XP_006638162.1) -----MFRTMVVQARKHPSLIPLVFVFIGSAGVATLYLARLALRNPVSWDRKKNPEPWN 55
HsMISTRH(NP_064527.1) MAGASLGARFYRQIKRHPGLIPMIGLICLGMGSAALYLLRLLALRSPVDCWDRKKNPEPWN 60
MmMISTRH(NP_001092259.1) MAGTSLGTRFYRQIKRHPGLIPMIGFICLGMGSAAGLYLLRLLALRSPVDCWDRKKNPEPWN 60
DrMISTRH(XP_005172187.1) ---MEILRMMHRQAKKHPLIPQFVFMVGVCGASLYLIRLA-RGPHISWDRRNNPEPWN 56
DrMISTRHL(XP_001342709.2) ---MLLLRKVRDQVKKHPLIPQFFFICLGMGGAFYLFRLA-RGPHVWVKSTNPEPWN 56
LoMISTRH(XP_006629324.1) -----MIRLLVVRQAKKNPGLIPLFFFICLGMGGASLYLLRLLAIFHPHVSWNRKKNPEPWN 55
      . . . : * : : . : : . : : * * * * :

HsMISTRV(NP_115789.1) TVDPTVPQKLITINQQWKPIEELQNVQRVTK 83
MmMISTRV(NP_001004174.1) MVDPTQPQKLITINQQWKPV EELQKVR RATR 83
DrMISTRV(NP_001185677.1) MLDPSKPQKLLITINQQWKPV E ELEMVKKMTK 86
LoMISTRV(XP_006628702.1) NLDPRKPQKLITINQQWKPV EELQ MVKSITK 85
HsMISTR1(NP_002480.1) KLGPNQYKFYSVNVDYSKLKKERPDF----- 81
MmMISTR1(NP_035016.1) KLGPNQYKFYSVNVDYSKLKKEGPDF----- 82
DrMISTR1(NP_998190.1) KLGPNQYKLFVNMDYSKLKKDRPDF----- 82
DrMISTR1L(NP_998582.1) KMGPTDQYKFYAVNMDYSKLKKNGPDF----- 82
LoMISTR1(XP_006638162.1) KLGPNDRYKFFAVNMDY NK LKKNGPDF----- 82
HsMISTRH(NP_064527.1) RLS PNDQYKFLAVSTDYK LKKDRPDF----- 87
MmMISTRH(NP_001092259.1) RLS PNDQYKFLAVSTDYK LKKDRPDF----- 87
DrMISTRH(XP_005172187.1) KLSPTQQQLKLVAVTTDYK LKKEGPDF----- 83
DrMISTRHL(XP_001342709.2) QLS PSYQYKFLAINTDYK NLKKEGPDF----- 83
LoMISTRH(XP_006629324.1) KLS PSYQYKFMAVTTDYK NLKKGPEF----- 82
      . : * * : : . : : . : :
```



**Sorouri et al. Figure 3**

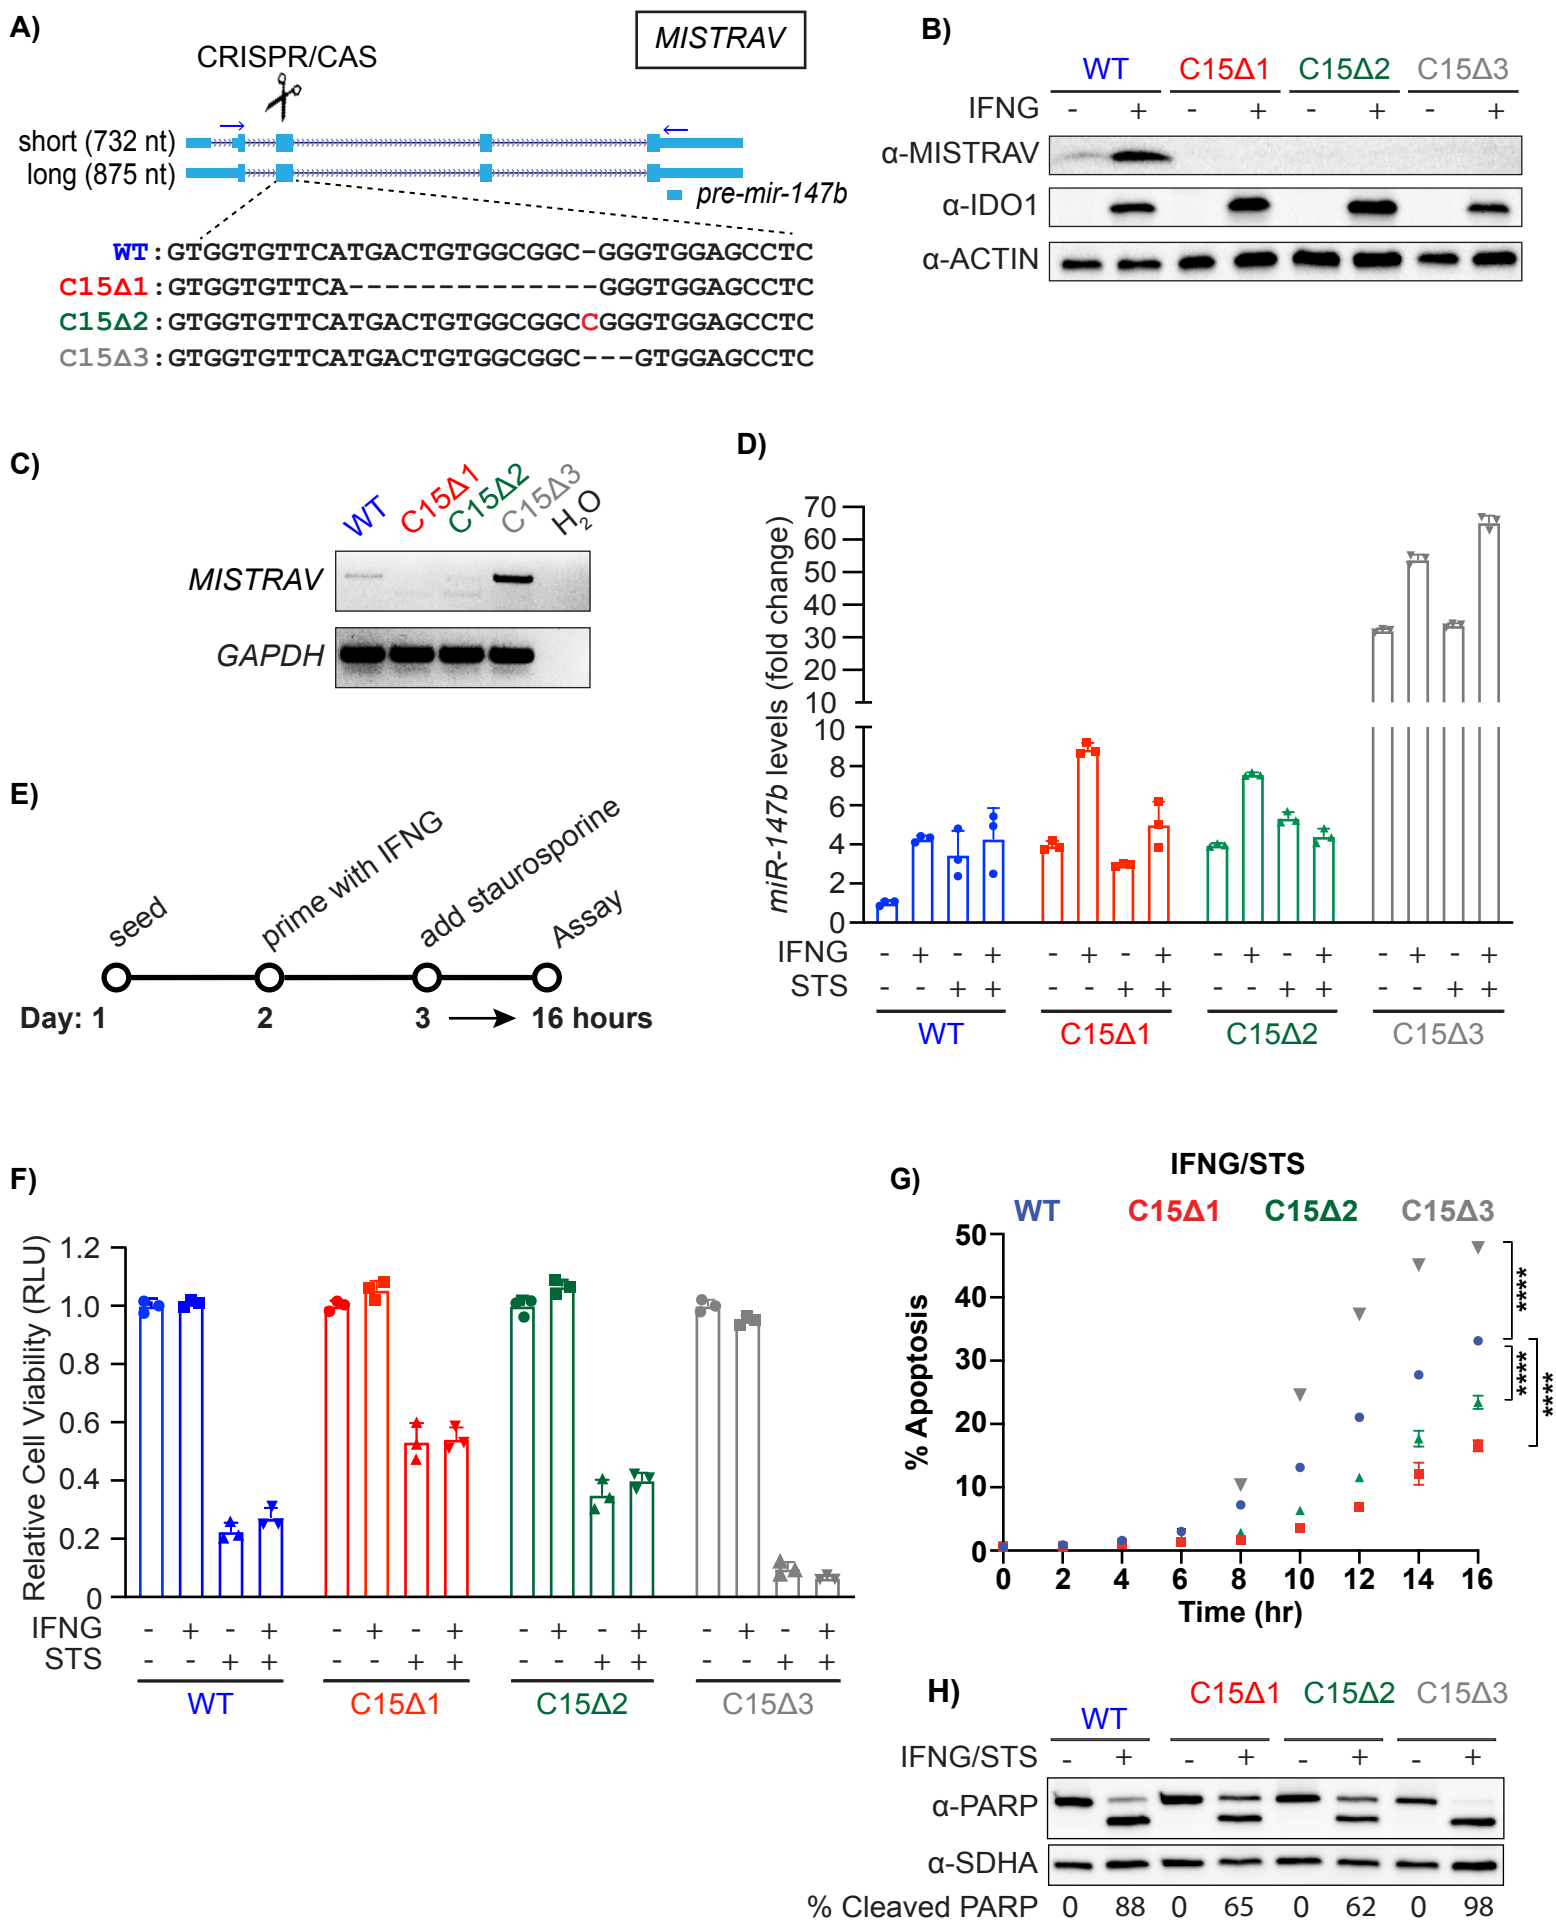

**Sorouri et al. Figure 3- figure supplement 1**

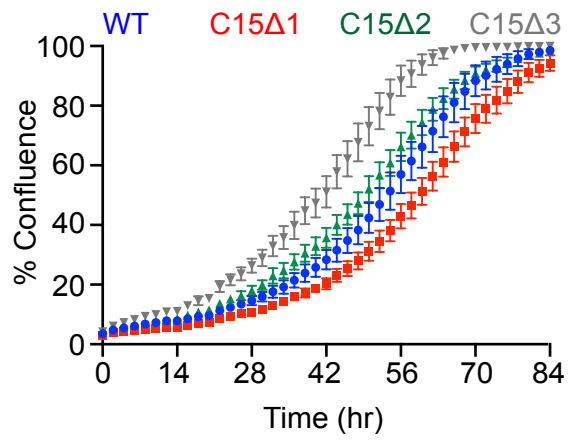

Sorouri et al. Figure 4

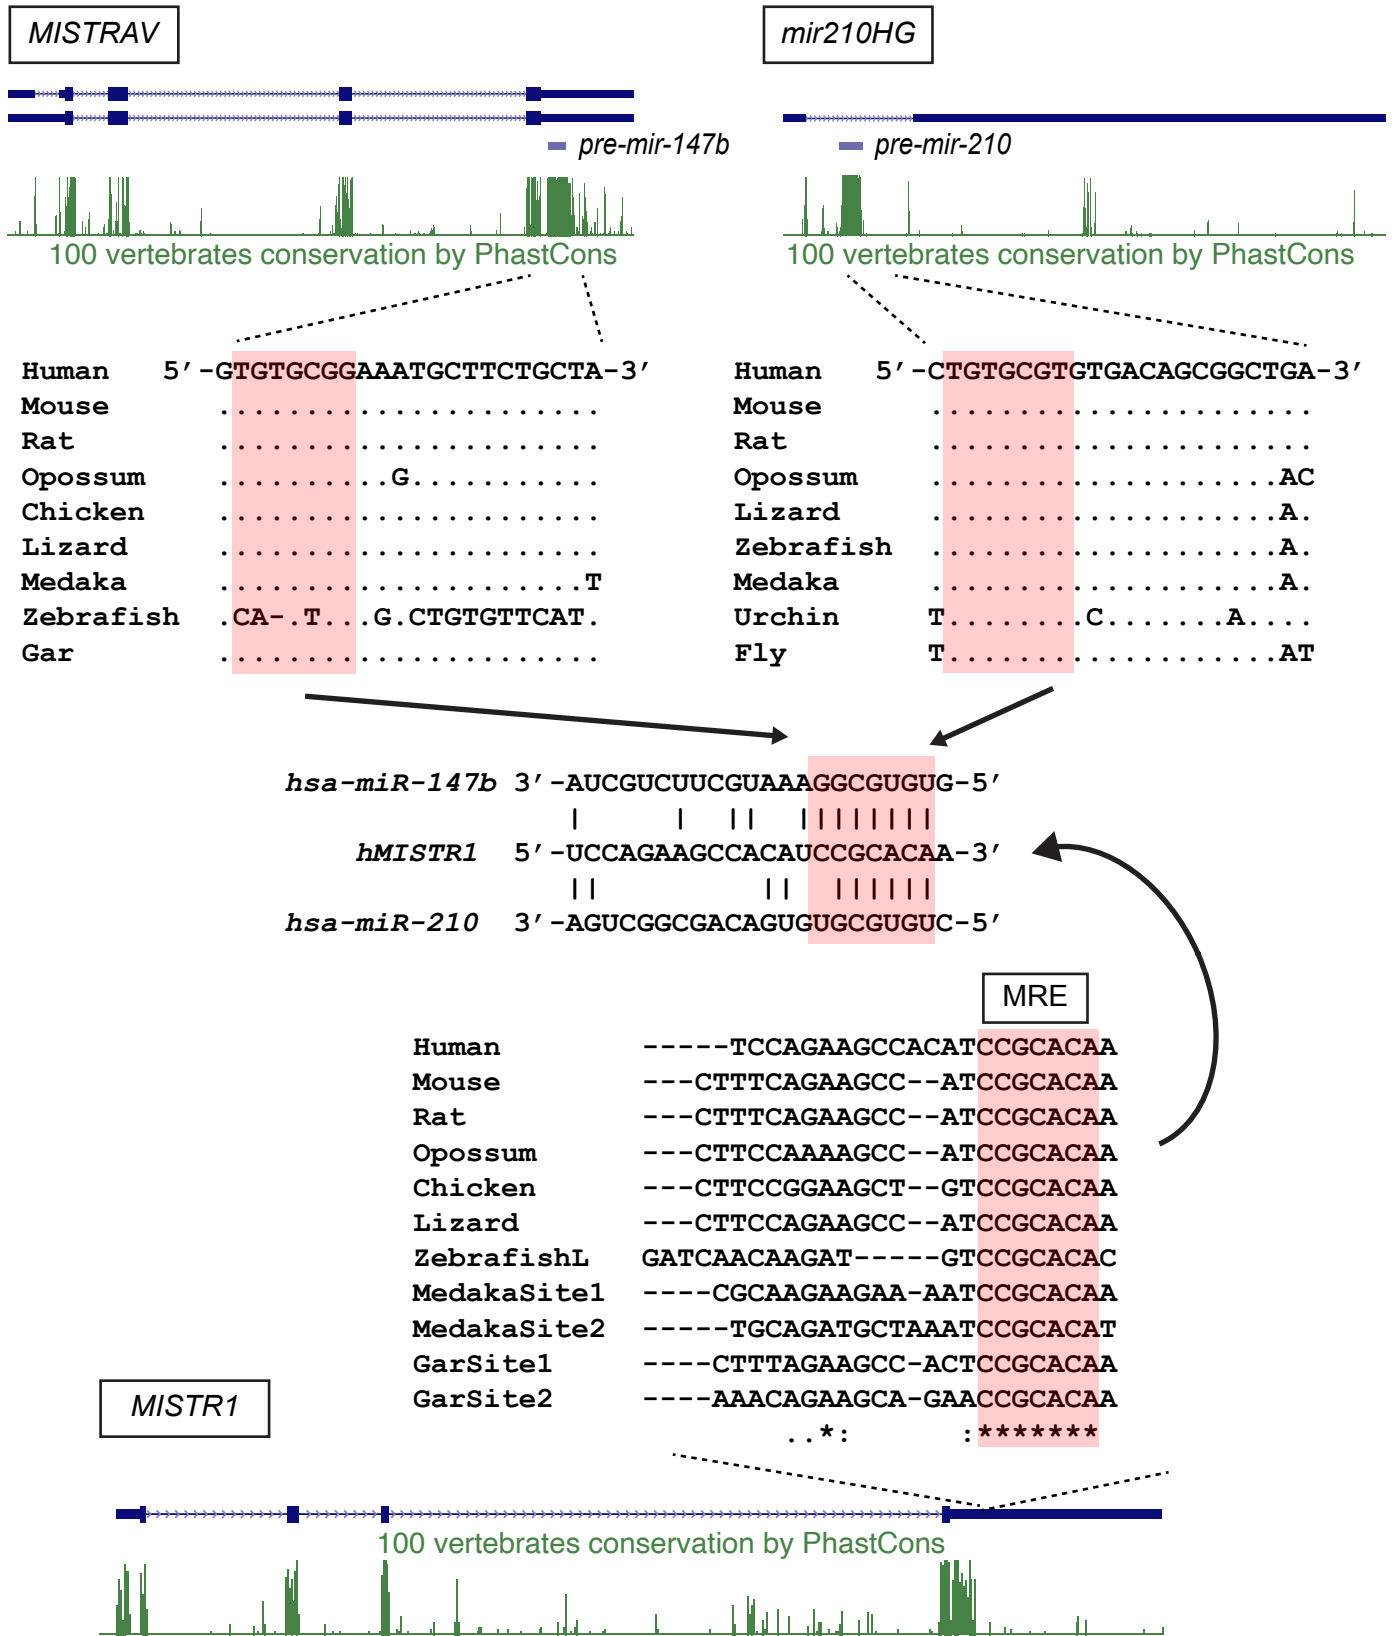

Sorouri *et al.* Figure 4- figure supplement 4

|                           |                                                               |     |
|---------------------------|---------------------------------------------------------------|-----|
| HsMISTRV (NM_032413.3)    | ---TGACGA-----GCCCTCG---CCTCTTTCTTCTGAAG-----                 | 29  |
| MmMISTRV (NM_001004174.2) | -----TGATTG-----CTCACCACCTCTCTCTCCAAAG-----                   | 29  |
| LoMISTRV (XM_006628639.2) | TAGAGATGA-----CCCTG--C-----CTGCTCTAAAGTCTCTGTGTCCACCAGCCTG    | 46  |
| DrMISTRV (NM_001198748.1) | ---TGACCAT-GATGCACACTGCAC--ATACGGTCTGGGGCTG-----              | 37  |
|                           | * * ** *                                                      |     |
| HsMISTRV (NM_032413.3)    | --AGTACTCTATAAATCTAGTGGAAACATTTCTGCA-----CAAAC TAGATT-----    | 74  |
| MmMISTRV (NM_001004174.2) | --AACACTCTATGAATCTAGTGGAAACATTTCTGCA-----CAAAC TAGATG-----    | 74  |
| LoMISTRV (XM_006628639.2) | CCTGCACCCATCAATCTAACGGAATCATTCTGCA-----CAGACTAGACT-----       | 93  |
| DrMISTRV (NM_001198748.1) | --CACAAATATTTGTTCCAGCA--TCGATATCTCCATGTGTCTGTTGAGTTTGATTATAG  | 93  |
|                           | * *** ** * ** *** ** * **                                     |     |
| HsMISTRV (NM_032413.3)    | CTGGACACCA GTGTGCGGAAATG-----CTTCTGCTACATTTT TAGGGTTTGTCTAC-- | 126 |
| MmMISTRV (NM_001004174.2) | TT-GATGCCA GTGTGCGGAAATG-----CTTCTGCTACATTTGTAGGGTTTGCCTGC--  | 125 |
| LoMISTRV (XM_006628639.2) | CTGAGAACCA GTGTGCGGAAATG-----CTTCTGCTACATTTGGTAGGGTCTGACCACCA | 147 |
| DrMISTRV (NM_001198748.1) | CTGATCAGCA GTG--GAGACTGTGTTTACATTACATTT--GATTATTCAACTG        | 146 |
|                           | * ***** * * ** ** ***** * * * *                               |     |
| HsMISTRV (NM_032413.3)    | -----ATTT---TTTGGGCTCTGGATAAGGAATTAAAGGAGTGCAGCAATA           | 169 |
| MmMISTRV (NM_001004174.2) | -----ATTC---TTTGATCCTGCATTAGCAAGTGAAGG-----T                  | 157 |
| LoMISTRV (XM_006628639.2) | ACAGGTCTGTGGGACTGT--AGTAGGTCCTCAGCTGGAATTCA---CTAAAGCAAGC     | 200 |
| DrMISTRV (NM_001198748.1) | -----ACTTCAGTTTGACTCCTGGCAAACCATATAA-----                     | 177 |
|                           | * ** * *                                                      |     |
| HsMISTRV (NM_032413.3)    | ACTGCACTGTCT--AAAA--GTTTGTGCTTATTTT-CTTGTAATAATTGAA---TATTGC  | 220 |
| MmMISTRV (NM_001004174.2) | AGCACATAGTCT--AAAATAGTTTCTGTGTTTATT-GGTGTAATAATTCAA---TTTTAC  | 211 |
| LoMISTRV (XM_006628639.2) | GCCGCACAGCTAGGAAAACAGAGGACTGA--ACATT-CTGGCAGCTC-----GTCC      | 248 |
| DrMISTRV (NM_001198748.1) | ---GCAGTCTC-----ATTTCACTTTCATCTCTGCTCTGTCT---                 | 212 |
|                           | ** * * * *                                                    |     |
| HsMISTRV (NM_032413.3)    | ATATTGAAATTTTGTTTATGATCTA-----TGAATGTTTTTCTTAAAA---           | 264 |
| MmMISTRV (NM_001004174.2) | AGTTGAAATTTTATGTTTGTGATGCT-----TGGATATTTTCTTAAAA---           | 255 |
| LoMISTRV (XM_006628639.2) | TCATTAAACCATGTGATTGTATTATAGCAAAATGTGACTGATTACCCTTATTAC-----   | 303 |
| DrMISTRV (NM_001198748.1) | -----TATTTCTTTACTCCATTACAGGATCAATCTGAAGATGCCAATCCAATAACA      | 263 |
|                           | * * ** ** * *                                                 |     |
| HsMISTRV (NM_032413.3)    | -----TTTACAAAGCTTT--GTAATTAGAT---TTTCTTT                      | 295 |
| MmMISTRV (NM_001004174.2) | -----TGTATAACATGT--AAAATTAGATTACTGCCTGT                       | 289 |
| LoMISTRV (XM_006628639.2) | -----TATAC--TGATTAACATAGTGTACATAATGGCCTAT                     | 337 |
| DrMISTRV (NM_001198748.1) | GATACTCAAGTCACCTGCTGAAATTGTACTCATAT---CAGAATATATATCATATAC--T  | 318 |
|                           | * ** * * ** * *                                               |     |
| HsMISTRV (NM_032413.3)    | AATAAAATGCCATTTGTGCAAGATTTCTCAAAGATTAGGTATATATTTAAATGGAAGAGA  | 355 |
| MmMISTRV (NM_001004174.2) | AATAAAATAA-----TTCGATGACTA-----                               | 310 |
| LoMISTRV (XM_006628639.2) | AAAATAAAGAATGTA-----GTTCAAAGAT-----                           | 362 |
| DrMISTRV (NM_001198748.1) | AATAAAACATAT-----                                             | 330 |
|                           | ** * **                                                       |     |
| HsMISTRV (NM_032413.3)    | AAATATTTTTATGGGAGAAAAATACATTTGAACCATGAAATTTTCATCTTTTAAATAACAT | 415 |
| MmMISTRV (NM_001004174.2) | -----                                                         | 310 |
| LoMISTRV (XM_006628639.2) | -----                                                         | 362 |
| DrMISTRV (NM_001198748.1) | -----ATCAT                                                    | 335 |
| HsMISTRV (NM_032413.3)    | CCAGTACAGATTTCTGTGTAA                                         | 436 |
| MmMISTRV (NM_001004174.2) | -----                                                         | 310 |
| LoMISTRV (XM_006628639.2) | -----                                                         | 362 |
| DrMISTRV (NM_001198748.1) | GCAG-----                                                     | 339 |

**Sorouri et al. Figure 5**

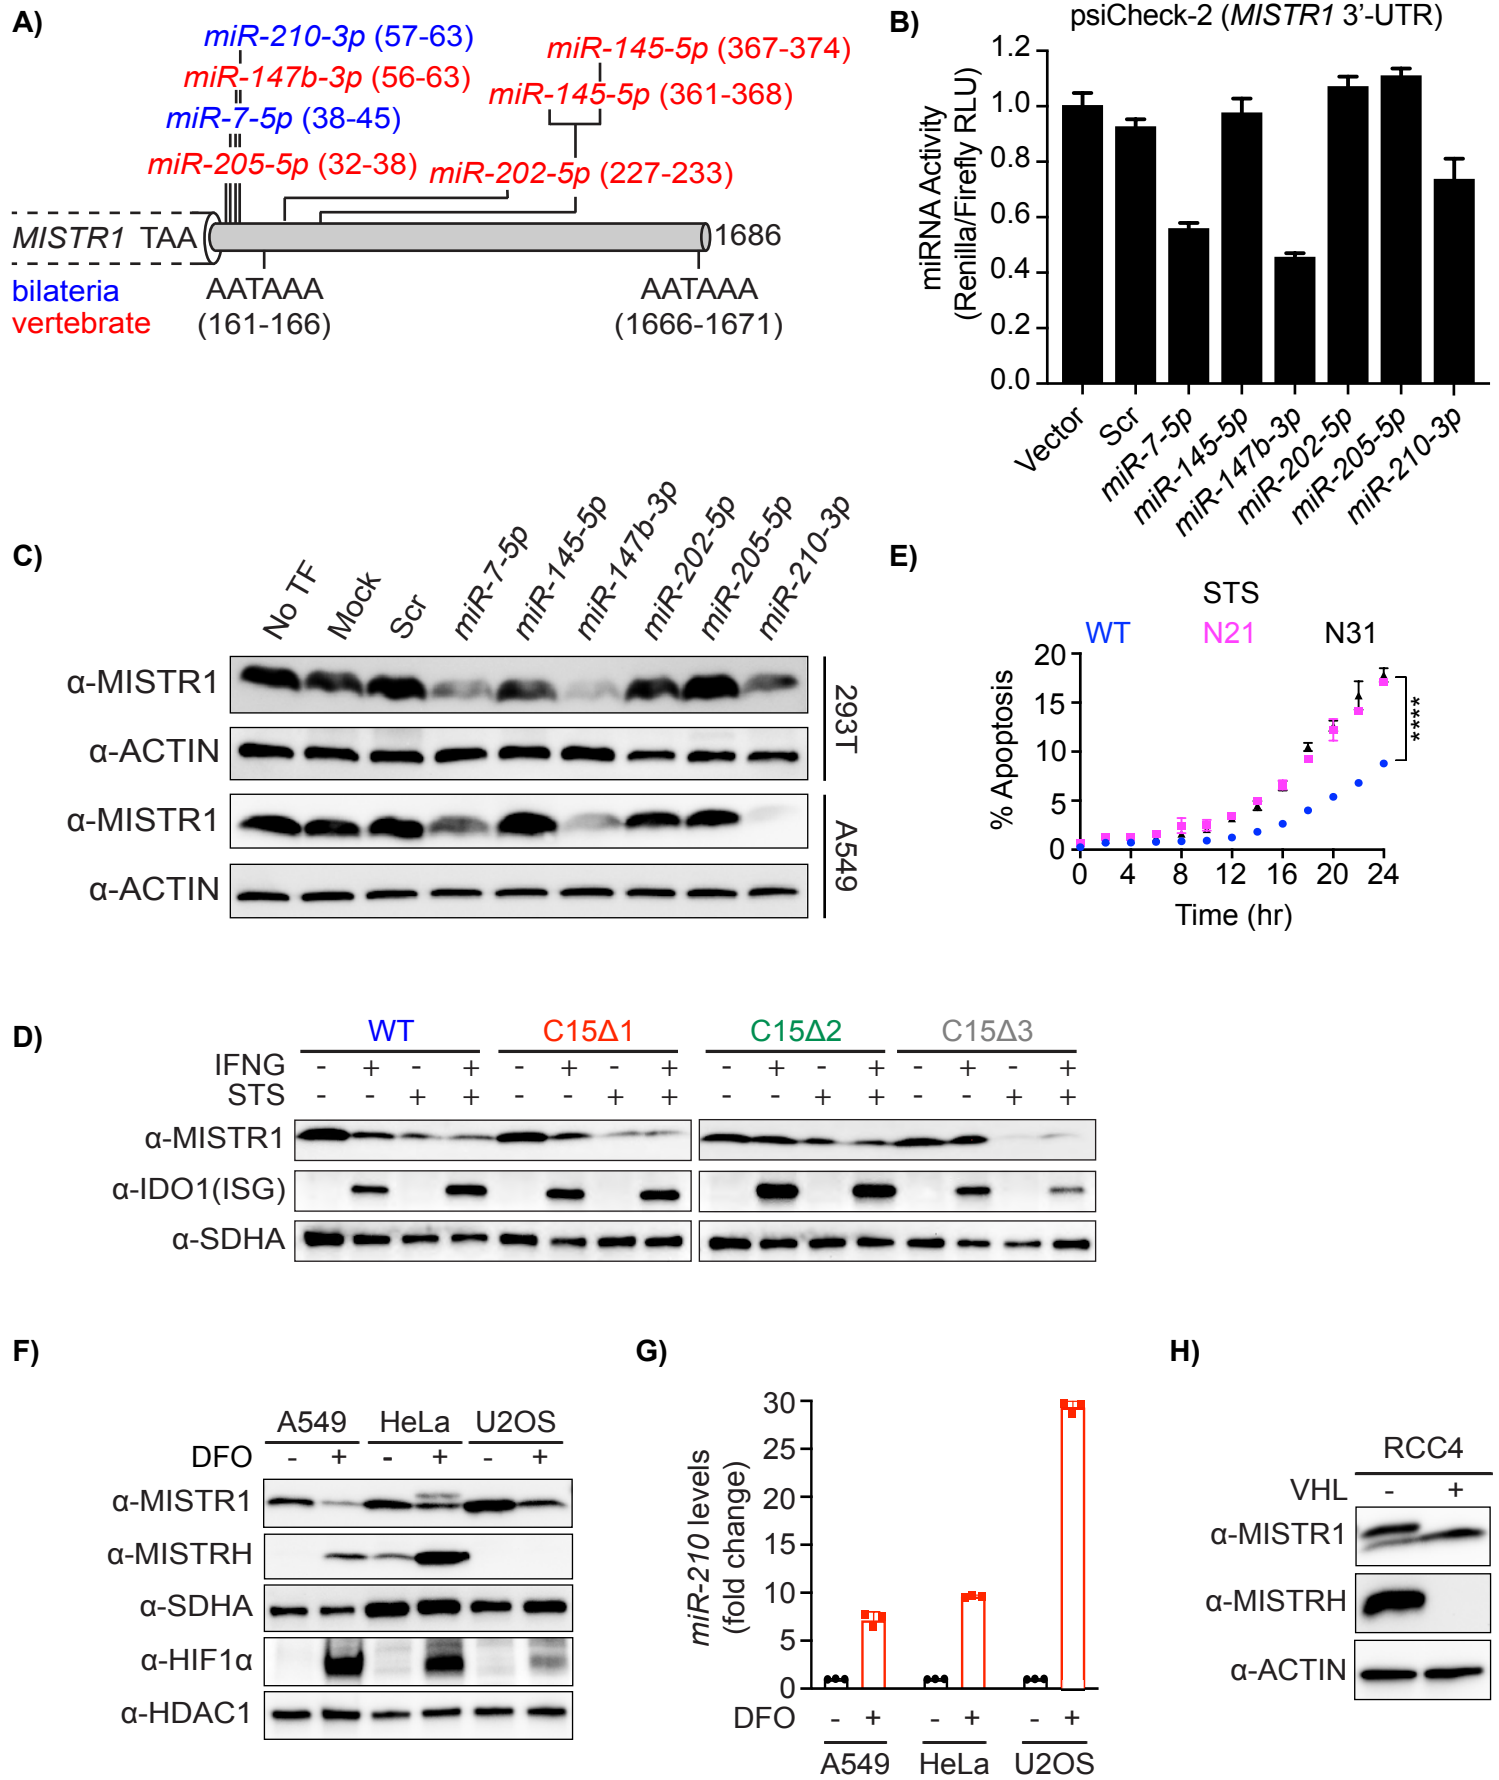

**Sorouri et al. Figure 5- figure supplement 1**

**A)**

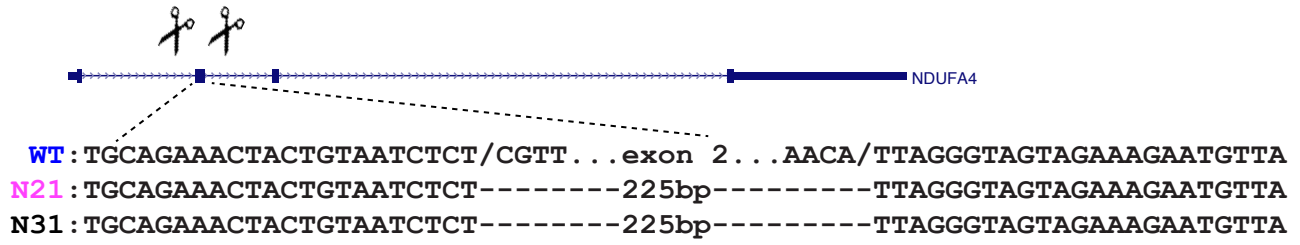

**B)**

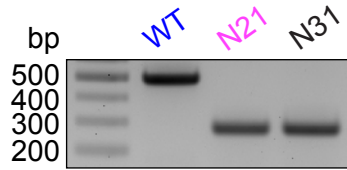

**C)**

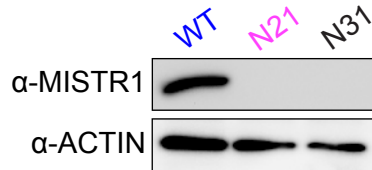

**D)**

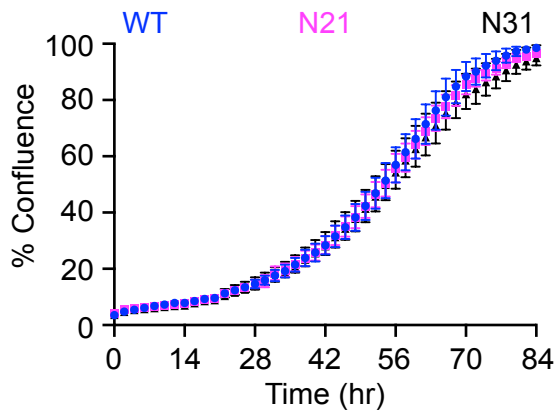

**E)**

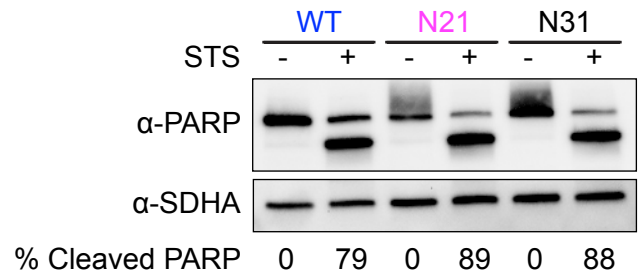

Sorouri et al. Figure 6

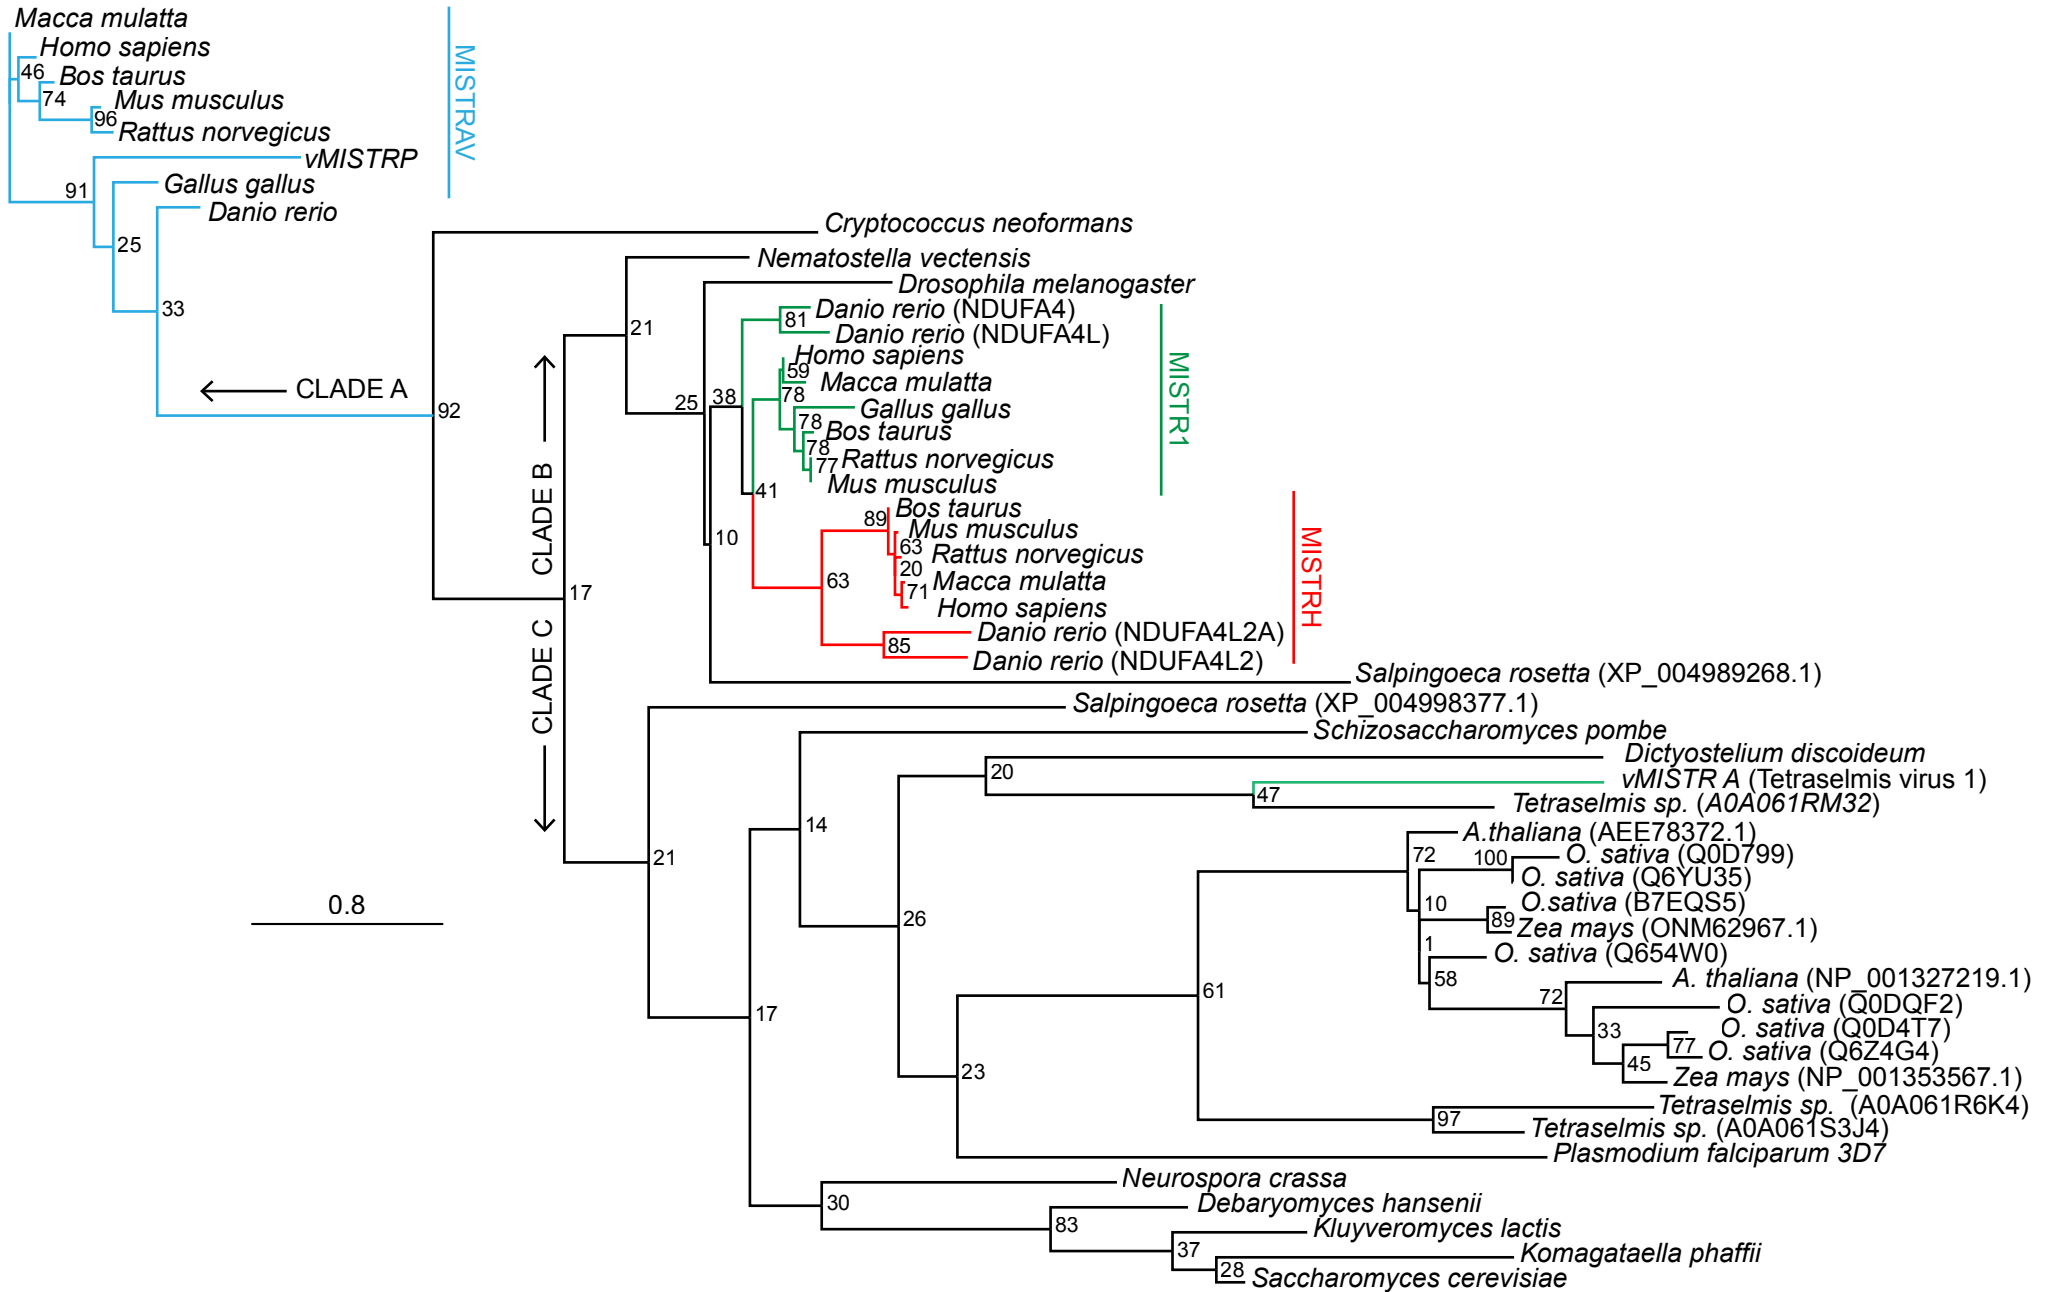

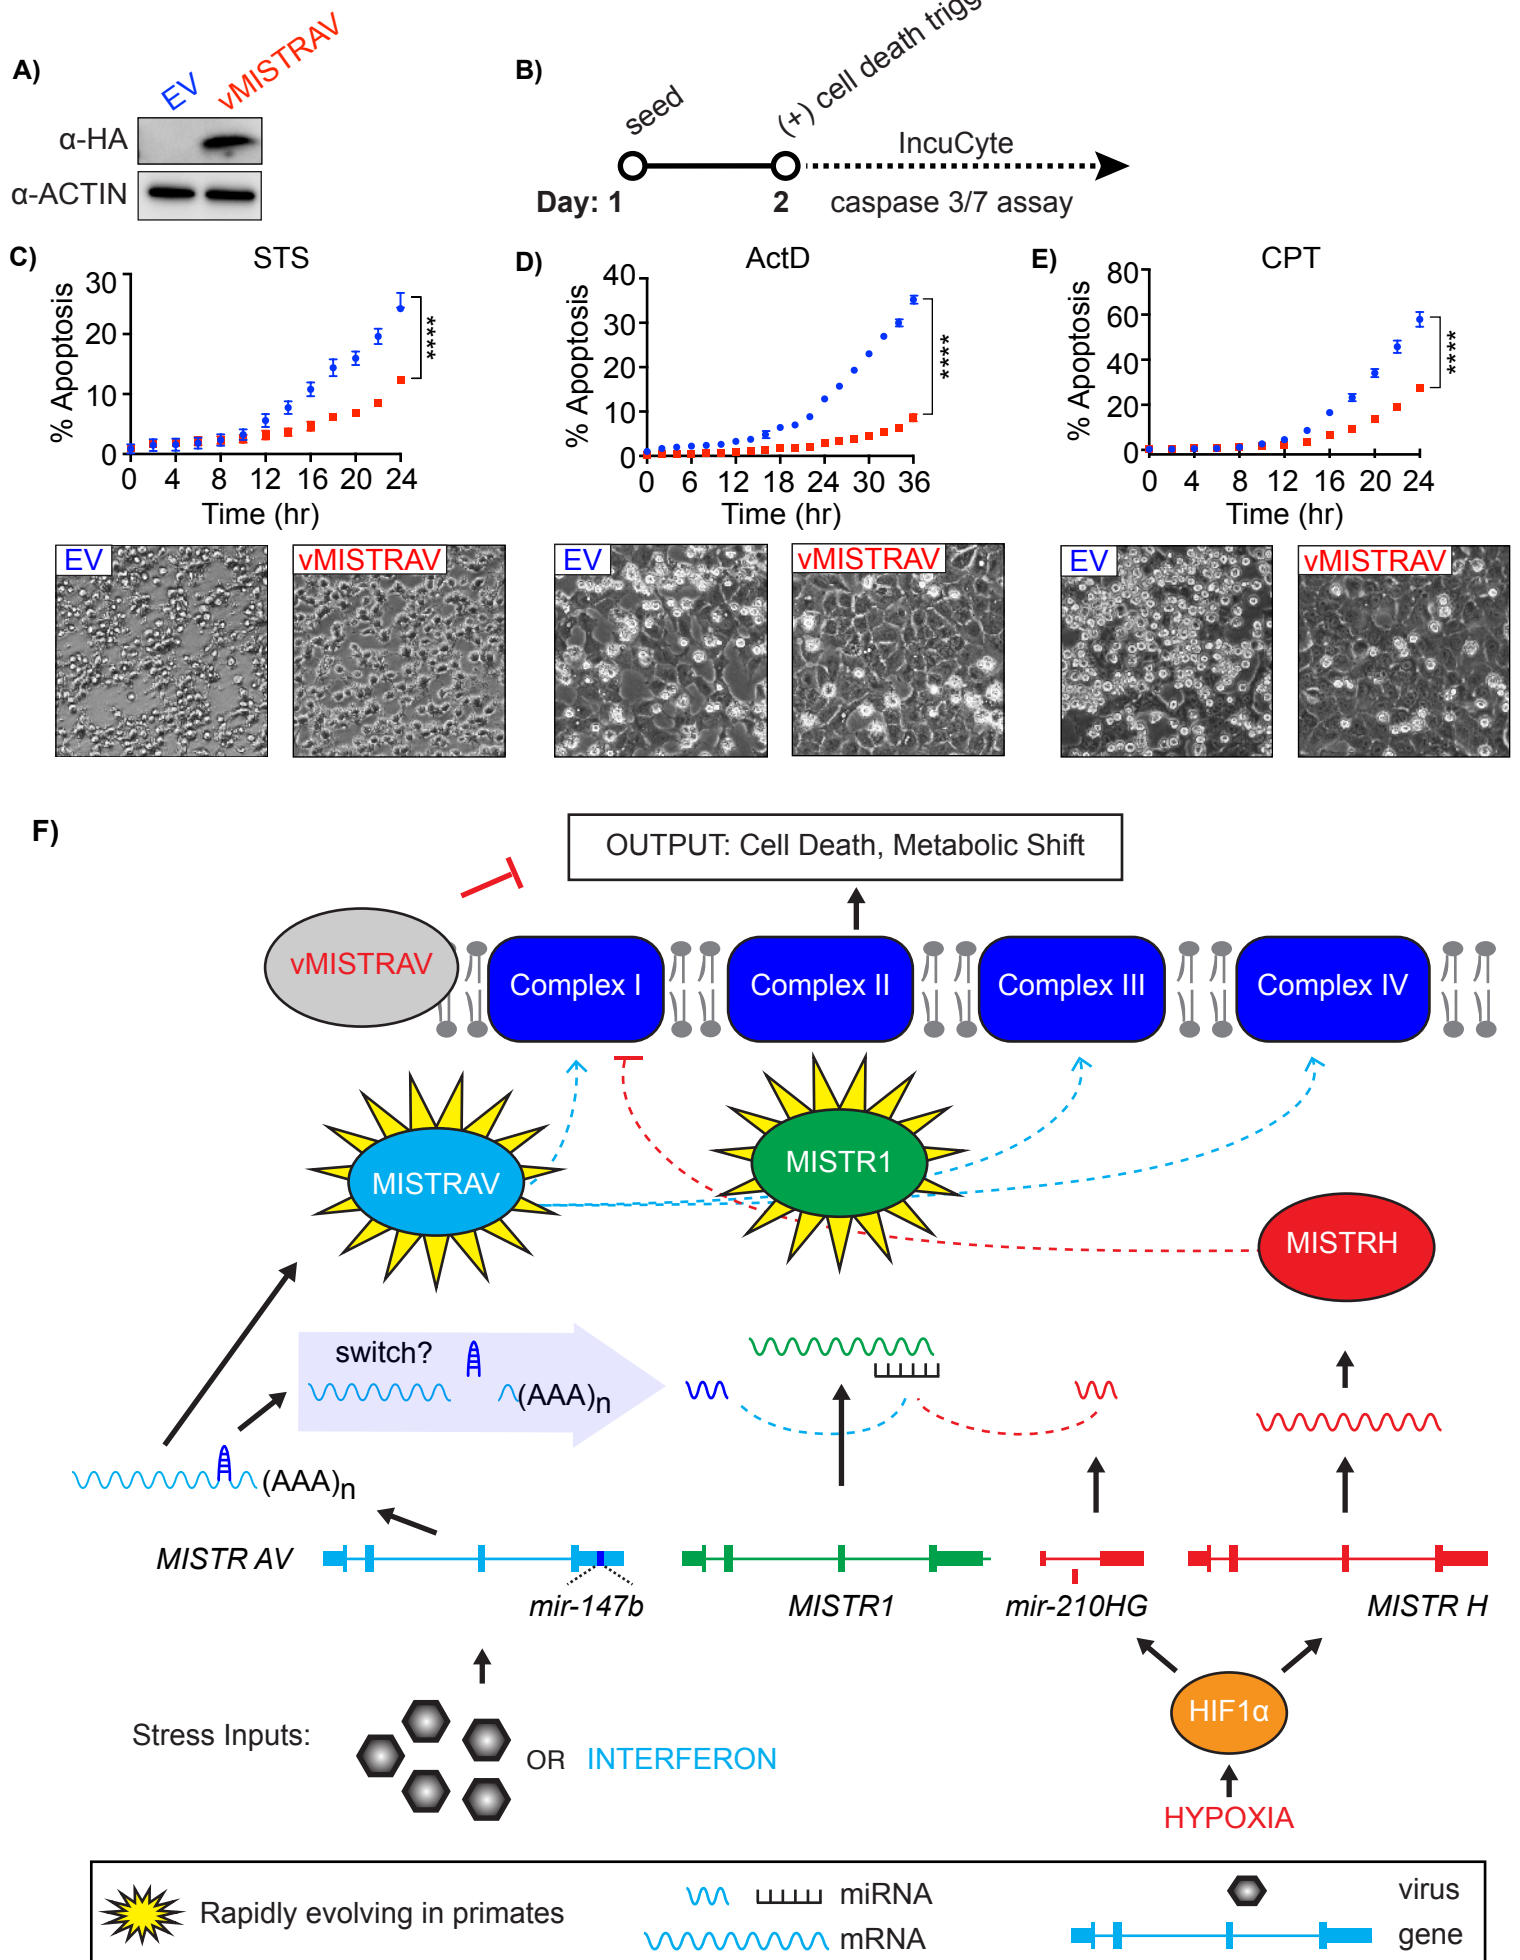



Sorouri et al. Figure 7- figure supplement 1

A)

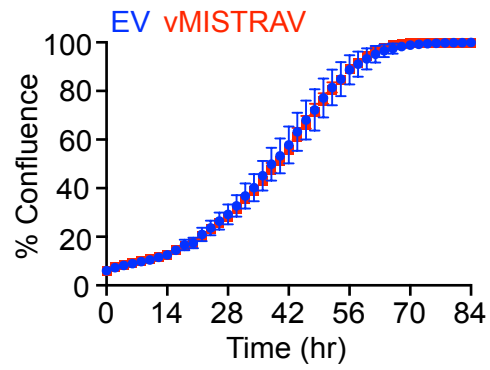

B)

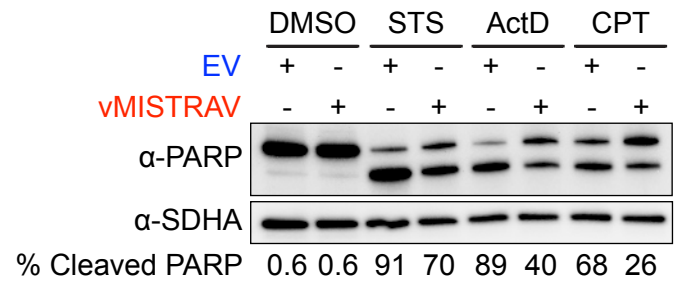

Source: https://www.biorxiv.org/content/10.1101/2020.01.25.919811v1.full.pdf
